# Supplementary material for: Structural analysis of the Legionella pneumophila Dot/Icm type IV secretion system core complex
Source: eLife. 2020 Sep 2;9:e59530. doi: 10.7554/eLife.59530 (PMC7511231; doi:10.7554/eLife.59530)
Supplement: Supplementary file 1. — a UniProtKB Accession Number b Proteins were identified by searching the MS/MS data against L. pneumophila (UniProt; 2930 entries) using Proteome Discoverer (v2.1, Thermo Scientific). Search parameters included MS1 mass tolerance of 10 ppm and fragment tolerance of 0.1 Da. False discovery rate (FDR) was determined using Percolator and proteins/peptides with a FDR of ≤1% were retained for further analysis. c Dot/Icm T4SS components are in bold. [file elife-59530-supp1.xlsx]

## Sheet: High Conf >1 PSM one prep
Supplementary File 1: Proteins that copurify with Dot T4SS
		Spectral Counts b
Identified Proteins	Gene Number a	Prep 1	Prep 2	Prep 3
DNA-directed RNA polymerase subunit beta	Q5ZYQ0	206	114	219
DNA-directed RNA polymerase subunit beta'	Q5ZYP9	176	136	222
Elongation factor Tu	Q5ZYP5	174	112	264
60 kDa chaperonin	Q5ZXP3	147	92	187
Ribonucleoside-diphosphate reductase	Q5ZUL9	135	137	180
Elongation factor G	Q5ZYP6	127	88	172
IcmE (DotG) c	Q5ZYC1	112	114	195
50S ribosomal protein L2	Q5ZYP0	107	92	120
NADH-quinone oxidoreductase	Q5ZRU4	100	71	62
Phosphoribosylglycinamide synthetase ATP-grasp (A) domain protein	Q5ZZE4	98	71	66
Enoyl CoA hydratase	Q5ZV44	96	128	128
50S ribosomal protein L5	Q5ZYN1	95	98	123
IcmG (DotF)	Q5ZYC0	94	69	101
30S ribosomal protein S4	Q5ZYL9	82	91	103
LPS biosynthesis protein, PseA-like	Q5ZXI3	82	43	96
Cell shape-determining protein MreB	Q5ZXC1	77	67	135
ATP synthase subunit beta	Q5ZRA1	76	82	88
50S ribosomal protein L4	Q5ZYP2	74	71	71
3-hydroxyacyl CoA dehydrogenase oxidoreductase protein	Q5ZVT8	74	49	75
Phospholipase/lecithinase/hemolysin, lysophospholipase A, glycerophospholipid-cholesterol acyltransferase	Q5ZRP3	73	38	69
30S ribosomal protein S12	Q5ZYP8	72	43	50
Polyketide synthase, type I	Q5ZTH6	71	111	60
30S ribosomal protein S2	Q5ZUS8	71	48	91
Chaperone protein DnaK	Q5ZTY3	70	79	53
Ribonuclease E	Q5ZT68	70	57	61
NAD-glutamate dehydrogenase	Q5ZV59	70	55	84
Chaperone protein HtpG	Q5ZVS1	69	38	75
30S ribosomal protein S3	Q5ZYN7	68	71	101
2,4-dienoyl-CoA reductase FadH1	Q5ZT18	65	68	70
Uncharacterized protein	Q5ZRH0	62	84	48
Acyl CoA C-acetyltransferase	Q5ZUH3	62	54	72
50S ribosomal protein L3	Q5ZYP3	62	45	49
Lon protease	Q5ZUE1	60	62	59
Thiolase	Q5ZV43	58	68	81
Serine protein kinase	Q5ZRS0	56	51	72
50S ribosomal protein L1	Q5ZYQ3	54	49	50
Glutamine synthetase, type I	Q5ZVS6	54	41	57
Succinate dehydrogenase flavoprotein subunit	Q5ZY43	53	46	52
NADH-quinone oxidoreductase subunit D	Q5ZRU1	53	36	40
Aconitate hydratase A	P37032	53	34	69
30S ribosomal protein S1	Q5ZVL9	52	25	41
Protein translocase subunit SecA	Q5ZVH7	52	20	37
30S ribosomal protein S11	Q5ZYM0	51	63	62
Phenylalanine--tRNA ligase beta subunit	Q5ZS09	51	49	39
Pyruvate dehydrogenase E1 component	Q5ZVD6	50	31	40
Tetratricopeptide repeat domain 8	Q5ZXG6	46	43	41
Uncharacterized protein	Q5ZXU7	46	27	46
Alanine dehydrogenase	Q5ZX09	46	25	53
Dihydrolipoyllysine-residue succinyltransferase component of 2-oxoglutarate dehydrogenase complex	Q5ZY40	45	56	41
Enhanced entry protein EnhC	Q5ZS80	44	88	85
Aminopeptidase N	Q5ZRS1	44	30	47
50S ribosomal protein L22	Q5ZYN8	43	51	34
Major outer membrane protein	Q5ZRC1	43	47	106
Transcription termination factor Rho	Q5ZRE8	43	35	70
Glyceraldehyde-3-phosphate dehydrogenase	Q5ZZ73	43	32	55
Isocitrate dehydrogenase [NADP]	Q5ZXB6	43	28	63
Protein RecA	Q5ZUJ7	42	30	52
Succinate--CoA ligase [ADP-forming] subunit beta	Q5ZY39	42	24	52
Asparagine--tRNA ligase	Q5ZT80	42	19	39
Tyrosine phosphatase II superfamily protein	Q5ZRR1	42	15	42
UDP-N-acetylglucosamine 1-carboxyvinyltransferase	Q5ZX85	41	55	42
Signal recognition particle protein	Q5ZYH2	41	50	44
ATP synthase subunit alpha 2	Q5ZR99	41	34	71
Translation initiation factor IF-2	Q5ZRV4	41	34	33
ABC transporter, ABC binding protein	Q5ZXM8	41	33	64
Cell division protein FtsA	Q5ZSA9	40	37	40
S-adenosylmethionine synthase	Q5ZTY6	40	21	62
Carbamoyl-phosphate synthase large chain	Q5ZS94	39	30	44
Phosphoenolpyruvate synthase	Q5ZXC7	39	30	44
Leucine--tRNA ligase	Q5ZVU2	39	24	28
DotA	Q5ZS33	38	65	60
Threonine--tRNA ligase	Q5ZS05	38	25	30
Polyribonucleotide nucleotidyltransferase	Q5ZRV8	38	18	42
IcmB (DotO)	Q5ZYB6	37	38	47
2-oxoglutarate dehydrogenase E1 component	Q5ZY41	37	34	60
NADH-quinone oxidoreductase subunit F	Q5ZRU3	37	30	36
DNA-directed RNA polymerase subunit alpha	Q5ZYL8	37	29	49
UDP-N-acetylmuramate--L-alanine ligase	Q5ZSA5	37	28	46
tRNA-2-methylthio-N(6)-dimethylallyladenosine synthase	Q5ZVV6	37	15	37
ATP binding protease component ClpA	Q5ZXB4	36	39	53
PhoH protein (Phosphate starvation inducible protein)	Q5ZRN8	36	33	38
Serine hydroxymethyltransferase	Q5ZXK6	36	28	47
Zinc metalloprotease	Q5ZYA5	36	25	92
2-methylcitrate dehydratase PrpD	Q5ZVB1	36	23	48
Probable glycine dehydrogenase (decarboxylating) subunit 2	Q5ZZ97	36	22	56
DNA polymerase III subunit gamma/tau	Q5ZRX2	35	33	38
Catalase-peroxidase 1	Q5ZSX7	35	33	11
50S ribosomal protein L14	Q5ZYN3	35	30	44
DamX-related protein	Q5ZWZ9	35	29	46
Chaperone protein DnaJ	Q5ZTY4	35	25	23
Site-determining protein	Q5ZUR8	35	24	58
30S ribosomal protein S13	Q5ZYM1	35	24	40
50S ribosomal protein L17	Q5ZYL7	34	42	51
Bifunctional protein PutA	Q5ZUU6	34	22	43
L-lysine dehydrogenase	Q5ZVU0	34	21	43
N,N'-diacetyllegionaminic acid synthase	Q5ZXH9	33	46	26
Oxidoreductase, acyl CoA dehydrogenase family	Q5ZUR7	33	37	55
50S ribosomal protein L23	Q5ZYP1	33	31	19
Uncharacterized protein	Q5ZZK2	33	26	34
Uridine kinase	Q5ZUE5	33	25	40
Glutamine--fructose-6-phosphate aminotransferase [isomerizing]	Q5ZRP4	33	19	38
Piperidine-6-carboxylate dehydrogenase	Q5ZVT9	33	16	40
Phytanoyl-CoA dioxygenase	Q5ZS25	32	33	16
Uncharacterized protein	Q5ZTV1	32	24	18
Isoleucine--tRNA ligase	Q5ZWZ6	32	22	30
3-oxoacyl-(Acyl carrier protein) synthase	Q5ZZA9	31	55	32
ATP-dependent zinc metalloprotease FtsH	Q5ZRT2	30	37	30
Pyoverdine biosynthesis protein PvcA	Q5ZZ37	30	33	7
Aspartokinase	Q5ZUI7	30	31	27
Cell division protein FtsZ	Q5ZSB0	30	26	43
Imidazole glycerol-phosphate synthase	Q5ZXI2	30	24	60
Succinate--CoA ligase [ADP-forming] subunit alpha	Q5ZY38	30	21	37
Glu/Leu/Phe/Val dehydrogenase	Q5ZT86	30	21	29
Pyridoxal phosphate-dependent enzyme apparently involved in regulation of cell wall biosynthesis	Q5ZXH6	29	14	37
Elongation factor Ts	Q5ZUS9	29	11	33
50S ribosomal protein L15	Q5ZYM4	28	36	33
Protein translocase subunit SecD	Q5ZU07	28	22	46
Biotin carboxylase	Q5ZYB0	28	21	41
Dihydrolipoyl dehydrogenase	Q5ZVD8	28	21	30
IcmK (DotH)	Q5ZYC2	28	19	28
Peptidase, M23/M37 family	Q5ZY08	28	18	19
Urocanate hydratase	Q5ZVR1	28	16	24
Nucleoside-diphosphate sugar epimerases	Q5ZWW8	28	12	25
Acyl CoA dehydrogenase, short chain specific	Q5ZX64	28	11	29
Heptosyl transferase, glycosyltransferase family 9 protein	Q5ZS24	27	38	21
50S ribosomal protein L6	Q5ZYM8	27	32	40
Glutamyl-tRNA reductase	Q5ZT30	27	32	8
30S ribosomal protein S7	Q5ZYP7	27	31	24
Uncharacterized protein	Q5ZVH2	27	30	37
Elongation factor 4	Q5ZUD2	27	27	27
Chromosome partition protein Smc	Q5ZS99	27	27	18
DNA gyrase subunit B	Q5ZZK5	27	22	33
30S ribosomal protein S5	Q5ZYM6	27	20	27
Aspartate--tRNA(Asp/Asn) ligase	Q5ZVG2	27	20	22
Phosphomannomutase	Q5ZSN1	26	34	39
Long chain fatty acid transporter	Q5ZUI8	26	30	35
Uncharacterized protein	Q5ZZE5	26	19	18
Malate dehydrogenase	Q5ZT13	26	18	36
Proline--tRNA ligase	Q5ZXN7	26	14	22
UDP-N-acetylmuramoyl-tripeptide--D-alanyl-D-alanine ligase	Q5ZSA1	26	11	20
SPOR domain-containing protein	Q5ZVU7	26	10	23
Succinate dehydrogenase iron-sulfur protein subunit B	Q5ZY42	25	33	26
50S ribosomal protein L21	Q5ZS68	25	33	23
Acetyl-coenzyme A carboxylase carboxyl transferase subunit alpha	Q5ZXE6	25	27	29
Membrane-bound lytic murein transglycosylase A	Q5ZU14	25	24	26
30S ribosomal protein S9	Q5ZS13	25	24	23
HupB DNA binding protein HU-beta	Q5ZUE2	25	20	10
3-oxoacyl-[acyl-carrier-protein] synthase 2	Q5ZVP3	25	19	16
Ribonuclease R	Q5ZZB9	25	17	14
Polysaccharide ABC transporter, ATP binding protein	Q5ZXF8	25	16	25
Transcription accessory protein	Q5ZRP6	25	12	25
Peroxynitrite reductase, AhpC/Tsa family	Q5ZRB7	25	10	30
Arginine decarboxylase	A0A572	25	9	20
Uncharacterized protein	Q5ZTK0	24	33	39
DegP protease (Do-like, S2-serine-like)	Q5ZX30	24	27	52
30S ribosomal protein S14	Q5ZYN0	24	23	35
Peptidase, M23/M37 family	Q5ZY72	24	22	27
Zinc-type alcohol dehydrogenase-like protein	Q5ZTF4	24	21	44
30S ribosomal protein S21	Q5ZT07	24	20	24
Citrate synthase	Q5ZVB0	24	19	30
Valine--tRNA ligase	Q5ZXL2	24	18	19
2-oxoisovalerate dehydrogenase, E1 component, alpha and beta fusion	Q5ZSD8	24	13	24
Glutaryl CoA dehydrogenase	Q5ZSD9	24	11	25
Chromosome partitioning protein ParB	Q5ZRI9	23	30	19
Cell division protein FtsK	Q5ZUM7	23	23	21
Propionyl CoA carboxylase beta subunit	Q5ZUH1	23	22	25
Long chain acyl-CoA dehydrogenase	Q5ZYR8	23	20	36
Pyruvate dehydrogenase E1 component subunit alpha	Q5ZV82	23	15	24
Adenosylhomocysteinase	Q5ZTY7	23	14	29
Acetyl-coenzyme A synthetase	Q5ZZ84	23	13	11
Glutamine--tRNA ligase	Q5ZVY2	23	10	34
dTDP-glucose 4,6-dehydratase	Q5ZXH3	23	8	10
DhaL domain-containing protein	Q5ZZ08	22	42	7
50S ribosomal protein L20	Q5ZS07	22	25	25
DUF2807 domain-containing protein	Q5ZRN3	22	24	41
3-ketoacyl CoA thiolase	Q5ZVT7	22	24	19
30S ribosomal protein S10	Q5ZYP4	22	20	26
Transcriptional regulator FleQ	Q5ZX79	22	20	22
DNA mismatch repair protein MutS	Q5ZUJ3	22	19	23
Aminotransferase	Q5ZVI1	22	19	23
D-alanine--D-alanine ligase	Q5ZSA7	22	18	41
Phosphoglucosamine mutase	Q5ZRT4	22	17	30
Alanine--tRNA ligase	Q5ZUJ9	22	13	32
Chaperone protein ClpB	Q5ZUP3	22	12	23
Aminotransferase	Q5ZVL6	22	10	17
Arginine--tRNA ligase	Q5ZTX7	22	7	13
17kDa common antigen	Q5ZXJ1	21	28	30
Uncharacterized protein	Q5ZZC7	21	28	28
DNA polymerase III subunit alpha	Q5ZWX2	21	26	19
Acetylornithine aminotransferase	Q5ZRB4	21	19	29
Carbamoyl-phosphate synthase small chain	Q5ZTY5	21	17	8
Dihydrolipoamide acetyltransferase component of pyruvate dehydrogenase complex	Q5ZV80	21	16	19
ATP-dependent Clp protease ATP-binding subunit ClpX	Q5ZUE0	21	14	36
Serine--tRNA ligase	Q5ZY59	21	12	28
PHA synthase	Q5ZTA2	20	30	20
D-alanyl-D-alanine carboxypeptidase, fraction B penicillin binding protein 4	Q5ZSD0	20	28	48
Cell division ATP-binding protein FtsE	Q5ZS50	20	25	24
50S ribosomal protein L25	Q5ZS67	20	13	16
DNA gyrase subunit A	Q5ZVM3	20	10	19
Uncharacterized protein	Q5ZZ81	20	8	16
Nucleotidyltransferase PLUS glutamate rich protein GrpB PLUS ribosomal protein alanine acetyltransferase	Q5ZWJ7	19	38	2
Uncharacterized protein	Q5ZYZ2	19	28	13
50S ribosomal protein L16	Q5ZYN6	19	22	31
GTP cyclohydrolase II riboflavin biosynthesis	Q5ZTC1	19	21	32
30S ribosomal protein S17	Q5ZYN4	19	18	23
IcmX	Q5ZS30	19	13	28
Aminomethyltransferase	Q5ZZ93	19	13	25
Inosine-5'-monophosphate dehydrogenase	Q5ZUR9	19	13	19
Uncharacterized protein	Q5ZRK7	19	9	19
MoxR protein (ATPase) methanol dehydrogenase regulatory protein	Q5ZRM2	19	8	27
Polyphosphate kinase	Q5ZYS2	19	7	5
Global stress protein GspA	Q5ZTH1	18	33	50
Chromosomal replication initiator protein DnaA	Q5ZZK8	18	25	16
Shikimate kinase	Q5ZX01	18	24	30
Pyruvate dehydrogenase E1 beta subunit	Q5ZV81	18	21	24
Cystathionine beta-lyase	Q5ZX43	18	17	26
DNA topoisomerase 4 subunit A	Q5ZRA3	18	16	21
TldD protein	Q5ZWY3	18	15	14
30S ribosomal protein S8	Q5ZYM9	18	14	26
4-hydroxyphenylpyruvate dioxygenase	Q5ZT84	18	13	22
Transmembrane Tfp pilus assembly protein FimV (Twitching motility)	Q5ZVY9	18	13	14
Alcohol dehydrogenase (NADP-dependent, zinc-type)	Q5ZXW9	18	11	15
2-oxoacid_dh domain-containing protein	Q5ZZA1	18	11	14
Acyl CoA carboxylase subunit alpha subunit	Q5ZUG9	18	9	18
IolC/IolB transferase kinase protein	Q5ZUZ1	18	9	14
Uncharacterized protein	Q5ZWX8	18	8	13
Transcription termination/antitermination protein NusA	Q5ZRV3	18	7	23
Inosine 5'-monophosphate dehydrogenase	Q5ZRN7	18	7	16
DNA topoisomerase 4 subunit B	Q5ZXP0	18	5	8
Uncharacterized protein	Q5ZRK2	17	36	4
Sigma 54-dependent response regulator	Q5ZUN1	17	28	12
Acetoacetyl CoA reductase	Q5ZWM6	17	23	13
LigA, interaptin	Q5ZXN8	17	23	6
50S ribosomal protein L10	Q5ZYQ2	17	21	29
Major outer membrane protein	Q5ZU34	17	19	49
Epoxyqueuosine reductase QueH	Q5ZRY1	17	18	6
Membrane bound lytic murein transglycosylase	Q5ZUD1	17	16	19
Tryptophan synthase beta chain	Q5ZVY4	17	14	14
Virulence regulator BipA	Q5ZRQ8	17	10	22
Amine oxidase, flavin containing	Q5ZZ28	17	9	11
Electron transferring flavoprotein dehydrogenase	Q5ZW12	17	5	21
Uncharacterized protein	Q5ZZC4	17	4	6
FolC bifunctional protein	Q5ZVU8	16	22	8
FAD monooxygenase, PheA/TfdB family	Q5ZZ35	16	22	1
Citrate synthase	Q5ZVM5	16	21	18
UDP-N-acetylenolpyruvoylglucosamine reductase	Q5ZSA6	16	20	33
Protein HflK	Q5ZY88	16	20	24
30S ribosomal protein S6	Q5ZV48	16	20	20
GTP pyrophosphokinase ((P)ppGpp synthetase I) stringent stress response RelA	Q5ZVI3	16	20	19
Membrane protein insertase YidC	Q5ZR81	16	19	14
ABC transport system periplasmic substrate binding protein	Q5ZTW3	16	17	20
TPR repeat protein	Q5ZWM3	16	17	17
Acetyltransferase component of pyruvate dehydrogenase complex	Q5ZVD7	16	17	13
50S ribosomal protein L18	Q5ZYM7	16	16	29
50S ribosomal protein L19	Q5ZYH7	16	16	23
dTDP-4-dehydrorhamnose reductase	Q5ZXH4	16	16	10
Flavin containing monooxygenae	Q5ZXA1	16	15	12
Glycine--tRNA ligase beta subunit	Q5ZUF9	16	13	16
Methyltranfer_dom domain-containing protein	Q5ZXG2	16	12	13
Membrane bound lytic murein transglycosylase D	Q5ZVZ4	16	12	10
Methylmalonate-semialdehyde dehydrogenase	Q5ZZ82	16	11	28
DotB	Q5ZS43	16	11	7
3-oxoacyl-[acyl-carrier-protein] synthase 3	Q5ZVP7	16	6	11
Phosphogluconate dehydratase	Q5ZYF4	16	4	12
Glutathione synthase/ribosomal protein S6 modification enzyme	Q5ZZC8	15	25	17
Stringent starvation protein A	Q5ZS17	15	21	17
Oxidoreductase	Q5ZVR8	15	20	14
Type IV pilus biogenesis protein PilQ	Q5ZX02	15	19	22
IcmF	Q5ZYB4	15	18	36
50S ribosomal protein L11	Q5ZYQ4	15	18	21
Lipoprotein-releasing system ATP-binding protein LolD	Q5ZT78	15	18	19
Cell division protein ZipA	Q5ZSA0	15	16	7
Cystathionine beta synthase	Q5ZRD1	15	13	24
Penicillin binding protein 1A	Q5ZX08	15	11	18
Anthranilate synthase	Q5ZUQ9	15	11	4
Phosphoribosylformylglycinamidine synthase subunit PurQ	Q5ZUW6	15	9	12
NADH-quinone oxidoreductase subunit B	Q5ZRT9	15	8	15
Serine metalloprotease	Q5ZTY9	15	7	21
Probable hydrolase	Q5ZZK3	15	6	11
Uncharacterized protein	Q5ZZE6	15	5	4
Uncharacterized protein	Q5ZRJ7	15	4	3
Astacin protease	Q5ZR84	14	19	52
Protein HflC	Q5ZY87	14	17	31
50S ribosomal protein L13	Q5ZS12	14	17	14
50S ribosomal protein L27	Q5ZS69	14	15	21
Transmembrane protein	Q5ZS96	14	15	20
50S ribosomal protein L33	Q5ZY94	14	15	9
UDP-3-O-(3-hydroxymyristoyl) glucosamine N-acyltransferase	Q5ZY64	14	14	3
Outer membrane protein assembly factor BamA	Q5ZY66	14	12	20
Histidine--tRNA ligase	Q5ZV96	14	12	9
Periplasmic protein	Q5ZR91	14	11	18
Dipeptidyl aminopeptidase/acylaminoacyl peptidase	Q5ZTC2	14	11	16
NADH-dependent flavin oxidoreductase, Oye family	Q5ZRZ8	14	10	11
Pantothenate synthetase	Q5ZS57	14	9	10
D-alanyl-D-alanine carboxypeptidase	Q5ZVD1	14	8	23
Agglutination protein	Q5ZXA5	14	8	22
UDP-N,N'-diacetylbacillosamine 2-epimerase (hydrolyzing)	Q5ZXH8	14	8	13
Probable alpha-L-glutamate ligase	Q5ZYF8	14	8	12
tRNA uridine 5-carboxymethylaminomethyl modification enzyme MnmG	Q5ZRJ2	14	7	16
YdeN-like	Q5ZZE3	14	7	7
ATP-dependent protease ATPase subunit HslU	Q5ZXU0	14	6	13
ATP-dependent DNA helicase Rep	Q5ZRR4	13	36	5
sn-glycerol-3-phosphate transport, ATP binding protein	Q5ZUR4	13	21	17
Formamidopyrimidine-DNA glycosylase	Q5ZY18	13	21	1
ATP-grasp domain-containing protein	Q5ZZ33	13	20	15
Lipoprotein NlpD	Q5ZW05	13	17	23
Ribosomal protein S6 modification protein	Q5ZYJ3	13	15	13
Transmembrane protein	Q5ZUN8	13	15	12
Ribonucleoside-diphosphate reductase subunit beta	Q5ZUL8	13	14	9
Adenylosuccinate synthetase	Q5ZY86	13	13	18
ATP synthase gamma chain	Q5ZRA0	13	13	13
Glutamine synthetase	Q5ZTB0	13	11	13
Pyrophosphate--fructose 6-phosphate 1-phosphotransferase	Q5ZU94	13	10	13
Histidine ammonia-lyase	Q5ZVR0	13	10	11
Acetyl-coenzyme A carboxylase carboxyl transferase subunit beta	Q5ZVU9	13	9	14
3-oxoacyl-[acyl-carrier-protein] synthase 2	Q5ZYL1	13	9	12
Glutamate--tRNA ligase	Q5ZU96	13	8	19
NADH-quinone oxidoreductase subunit C	Q5ZRU0	13	8	13
Cysteine desulfurase IscS	Q5ZUP7	13	8	8
Zinc metalloprotein	Q5ZZ24	13	7	36
ABC transporter, ATP-binding component	Q5ZUD6	13	6	11
ATP-dependent RNA helicase DeaD	Q5ZT20	13	6	6
Enhanced entry protein EnhA	Q5ZXM7	13	5	14
Enolase	Q5ZTX1	13	5	13
DNA topoisomerase 1	Q5ZSC0	13	5	9
10 kDa chaperonin	Q5ZXP4	13	3	14
Phospho-2-dehydro-3-deoxyheptonate aldolase	Q5ZZE7	13	2	5
Flagellar motor switch protein FliG	Q5ZUN4	12	39	13
Signal peptide peptidase SppA (Protease IV)	Q5ZX77	12	23	12
DNA repair protein RadA	Q5ZT39	12	21	17
S-adenosylmethionine:tRNA ribosyltransferase-isomerase	Q5ZU04	12	21	8
Glycine betaine aldehyde dehydrogenase	Q5ZYX3	12	16	10
50S ribosomal protein L28	Q5ZY93	12	15	15
DUF58 domain-containing protein	Q5ZRM3	12	15	13
Uncharacterized protein	Q5ZVD5	12	15	11
Alanine dehydrogenase and pyridine nucleotide transhydrogenase	Q5ZX56	12	14	19
Copper efflux ATPase	Q5ZWQ0	12	12	11
Thioesterase domain-containing protein	Q5ZXA2	12	11	16
Cytochrome c type biogenesis protein CycH	Q5ZX67	12	11	15
Guanosine-3, 5-bis(Diphosphate)-3-pyrophosphohydrolase	Q5ZTZ9	12	11	11
Uncharacterized protein	Q5ZRE0	12	10	23
Uncharacterized protein	Q5ZX80	12	10	15
Methionine--tRNA ligase	Q5ZRJ9	12	10	14
GTPase Der	Q5ZV99	12	10	13
Asparagine synthetase (B)	Q5ZRD3	12	10	3
30S ribosomal protein S16	Q5ZYH3	12	9	14
Nucleoside diphosphate kinase	Q5ZV92	12	9	11
3-hydroxymyristoyl/3-hydroxydecanoyl-(Acyl carrier protein) dehydratases	Q5ZYL2	12	8	3
Cold shock protein CspE	Q5ZRQ5	12	7	12
Arabinose 5-phosphate isomerase	Q5ZX92	12	7	12
Ribosomal protein S12 methylthiotransferase RimO	Q5ZXP6	12	5	15
CTP synthase	Q5ZWA4	12	5	11
Probable glycine dehydrogenase (decarboxylating) subunit 1	Q5ZZ95	12	5	10
Xaa-Pro aminopeptidase	Q5ZZD4	12	5	10
Lysine--tRNA ligase	Q5ZUL6	12	4	12
Uncharacterized protein	Q5ZSU2	11	29	6
RNA polymerase sigma factor RpoD	Q5ZT04	11	20	16
Twitching motility protein PilT	Q5ZTZ5	11	19	15
50S ribosomal protein L31	Q5ZXT1	11	13	15
Endolytic peptidoglycan transglycosylase RlpA	Q5ZVD2	11	12	19
Ribose-phosphate pyrophosphokinase	Q5ZY30	11	12	7
Spore coat polysaccharide biosynthesis protein E (NeuB)	Q5ZXG3	11	11	18
ABC transporter ElsE	Q5ZXS2	11	11	13
Choline monooxygenase	Q5ZTE4	11	11	9
Acetoacetyl CoA synthetase	Q5ZUG7	11	10	16
Cell division protein ZapD	Q5ZVH4	11	10	5
Uncharacterized protein	Q5ZXG1	11	10	5
DotD	Q5ZS45	11	9	14
Sporulation initiation inhibitor protein Soj	Q5ZRJ0	11	8	12
UDP-N-acetylglucosamine--N-acetylmuramyl-(pentapeptide) pyrophosphoryl-undecaprenol N-acetylglucosamine transferase	Q5ZXC4	11	8	8
Catalase-peroxidase 2	Q5ZZ17	11	6	32
2-oxoglutarate ferredoxin oxidoreductase alpha subunit	Q5ZWY7	11	6	7
Phosphatidylcholine hydrolyzing phospholipase	Q5ZY70	11	4	12
Peptide maturation protein PmbA	Q5ZUM2	11	4	8
Oligopeptidase A	Q5ZZ70	11	4	8
Glucose-6-phosphate 1-dehydrogenase	Q5ZYF6	11	4	7
Myo-inositol catabolism protein IolD	Q5ZUZ2	11	3	11
Uncharacterized protein	Q5ZWX7	11	2	7
Quinolinate synthase	Q5ZXD3	11	1	6
Hypothetical virulence protein	Q5ZY48	10	30	2
IcmO (DotL)	Q5ZYC6	10	26	20
Response regulator GacA	Q5ZS73	10	23	9
DNA-binding response regulator	Q5ZVZ6	10	19	11
Putative phosphoenolpyruvate synthase regulatory protein	Q5ZVB2	10	14	15
Glycosyl hydrolase	Q5ZX48	10	14	9
NAD dependent epimerase/dehydratase, UDP-glucose-4-epimerase	Q5ZXH0	10	12	7
Type II protein secretion LspD	Q5ZVW8	10	11	16
Uncharacterized protein	Q5ZY54	10	11	6
3-oxoacyl-(Acyl carrier protein) synthase II, N-terminal	Q5ZYL0	10	10	8
Myo-inositol-2-dehydrogenase	Q5ZUZ0	10	9	14
Holliday junction ATP-dependent DNA helicase RuvB	Q5ZV64	10	9	11
Enoyl-[acyl-carrier-protein] reductase [NADH]	Q5ZUE4	10	9	9
NADH-quinone oxidoreductase subunit I	Q5ZRU6	10	8	16
Aminopeptidase	Q5ZRR6	10	7	26
UvrABC system protein A	Q5ZYI8	10	7	13
Glutathione S-transferase	Q5ZU99	10	7	11
N-succinylglutamate 5-semialdehyde dehydrogenase	Q5ZUT5	10	7	2
Phosphoglycerate kinase	Q5ZZ74	10	6	21
Electron transfer flavoprotein, beta subunit	Q5ZX11	10	6	14
Acyl CoA dehydrogenase	Q5ZUH4	10	6	13
Cell division protein FtsQ	Q5ZSA8	10	6	11
Dienelactone hydrolase family protein	Q5ZS54	10	6	9
Probable sphingosine-1-phosphate lyase	Q5ZTI6	10	4	10
Tyrosine--tRNA ligase	Q5ZY07	10	4	7
Glucose-6-phosphate isomerase	Q5ZXH2	10	2	8
Inclusion membrane protein A	Q5ZT67	9	24	7
Alkyl hydroperoxide reductase AhpD	Q5ZTP9	9	18	26
RimK domain-containing protein	Q5ZUY6	9	18	10
Uncharacterized protein	Q5ZZE8	9	17	8
HlyD family secretion protein	Q5ZXS3	9	14	22
Pyoverdine biosynthesis protein PvcB	Q5ZZ36	9	13	3
DotC	Q5ZS44	9	11	16
Efflux pump membrane transporter	Q5ZSK5	9	11	10
RND multidrug efflux membrane fusion protein	Q5ZSK4	9	10	23
Conserved domain protein	Q5ZTW4	9	10	15
30S ribosomal protein S18	Q5ZV49	9	10	10
ATPase associated with chromosome architecture	Q5ZUM9	9	10	6
Recombination-associated protein RdgC	Q5ZW99	9	8	8
Aminopeptidase N	Q5ZVE3	9	8	5
F-box domain-containing protein	Q5ZSJ2	9	8	2
Cytochrome c oxidase subunit 2	Q5ZRI4	9	7	14
RNA polymerase sigma-54 factor	Q5ZY95	9	7	11
Phenylalanine--tRNA ligase alpha subunit	Q5ZS08	9	7	4
4-hydroxy-tetrahydrodipicolinate reductase	Q5ZZ80	9	7	1
GMP synthase [glutamine-hydrolyzing]	Q5ZUS0	9	6	7
Uncharacterized protein	Q5ZTK1	9	6	6
Phosphomannose isomerase GDP mannose pyrophosphorylase	Q5ZRJ4	9	6	4
ATP-dependent Clp protease proteolytic subunit	Q5ZUD9	9	4	14
Glycerol kinase	Q5ZVM6	9	4	10
Lipoyl synthase	Q5ZXI6	9	4	10
Uncharacterized protein	Q5ZRA8	9	4	6
Uncharacterized protein	Q5ZUH5	9	4	6
Putative phage protein	Q5ZZ61	9	4	2
N-succinylarginine dihydrolase	Q5ZUT4	9	3	10
Transketolase	Q5ZZ72	9	3	7
Beta sliding clamp	Q5ZZK7	9	3	6
Alcohol dehydrogenase, iron containing	Q5ZTB2	9	2	4
Phasin_2 domain-containing protein	Q5ZY12	9	1	3
Flagellar GTP-binding protein FlhF	Q5ZUK9	8	37	4
Choline kinase	Q5ZVN2	8	22	2
Hydrogenase expression/formation protein HypB	Q5ZSP2	8	20	3
ABC type dipeptide/oligopeptide/nickel transport, ATPase component	Q5ZXN9	8	19	5
Uncharacterized protein	Q5ZS82	8	18	3
Uncharacterized protein	Q5ZRC9	8	17	1
Sec translocon accessory complex subunit YajC	Q5ZU06	8	14	17
Stringent starvation protein B	Q5ZS18	8	12	10
Spermidine/putrescine import ATP-binding protein PotA	Q5ZWE4	8	12	6
DNA helicase	Q5ZUF6	8	11	20
Polyphenol oxidase	Q5ZVV8	8	11	5
Metallo-beta-lactamase family protein	Q5ZXF1	8	11	5
DNA polymerase III subunit epsilon	Q5ZVQ6	8	10	7
Aminotransferase	Q5ZZE1	8	9	15
GTPase Era	Q5ZWZ1	8	9	7
4-hydroxy-tetrahydrodipicolinate synthase	Q5ZT51	8	9	2
ATP-dependent DNA helicase RecQ	Q5ZX65	8	9	1
Peptidyl-prolyl cis-trans isomerase	Q5ZRZ4	8	8	6
UDP-3-O-acyl-N-acetylglucosamine deacetylase	Q5ZSB1	8	8	5
Glucose-1-dehydrogenase	Q5ZYL4	8	7	11
Uncharacterized protein	Q5ZXG0	8	7	10
Aspartate-semialdehyde dehydrogenase	Q5ZT63	8	7	9
Soluble lytic murein transglycosylase	Q5ZXR8	8	7	6
Adenosine deaminase	Q5ZY00	8	6	14
SPOR domain-containing protein	Q5ZVW0	8	6	9
DNA polymerase I	Q5ZZB2	8	6	7
Dehydrogenase, short chain (Dhs-6C)	Q5ZVQ8	8	6	2
2-amino-3-ketobutyrate coenzyme A ligase	Q5ZXN0	8	5	8
Malonyl CoA-acyl carrier protein transacylase	Q5ZVP6	8	5	7
Periplasmic protein	Q5ZUJ1	8	5	1
(Beta)-carbonic anhydrase	Q5ZTG8	8	4	12
Short chain dehydrogenase	Q5ZYW8	8	4	7
Trigger factor	Q5ZUD8	8	4	6
Uncharacterized protein lpg1689	P37033	8	4	2
Putative agmatine deiminase	Q5ZZK4	8	3	12
Replicative DNA helicase	Q5ZXJ3	8	3	8
Competence related protein ComM	Q5ZXZ0	8	3	3
Lipoprotein	Q5ZR88	8	2	11
Tol-Pal system protein TolB	Q5ZV69	8	2	6
Protein-L-isoaspartate-O-methyltransferase	Q5ZXN1	8	2	6
Peptidylprolyl isomerase	Q5ZUE3	8	1	9
Cysteine desulfurase	Q5ZXX6	8	1	6
ATP synthase F1, beta chain	Q5ZWN1	7	23	6
Uncharacterized protein	Q5ZWX1	7	22	8
16 kD immunogenic protein	Q5ZUS7	7	18	4
IcmL-like	Q5ZTH2	7	15	12
Phenazine biosynthesis PhzF	Q5ZVA9	7	15	3
Enhanced entry protein EnhA	Q5ZS78	7	13	8
3-hydroxyacyl CoA dehydrogenase	Q5ZU66	7	12	3
Formate dehydrogenase	Q5ZYS8	7	10	8
Uncharacterized protein	Q5ZVF1	7	10	1
Aldehyde dehydrogenase	Q5ZVQ9	7	9	13
Stearoyl-CoA-9-desaturase	Q5ZY17	7	9	11
Glucose-1-phosphate thymidylyltransferase	Q5ZXH1	7	9	5
Transcription termination/antitermination protein NusG	Q5ZYQ5	7	8	15
Uncharacterized protein	Q5ZS97	7	8	11
dTDP-4-dehydrorhamnose 3,5-epimerase	Q5ZXH5	7	8	7
Lipopolysaccharide biosynthesis glycosyltransferase	Q5ZXB1	7	8	5
Oxidoreductase, short chain dehydrogenase/reductase family	Q5ZYS5	7	8	5
N-acetylmuramoyl-L-alanine amidase	Q5ZS21	7	7	16
DNA binding protein Fis	Q5ZY31	7	7	9
Iron-sulfur cluster carrier protein	Q5ZUI5	7	7	8
DNA-binding protein, putative	Q5ZV95	7	7	7
Uncharacterized protein	Q5ZX12	7	7	5
Membrane-bound lytic murein transglycosylase A	Q5ZSH3	7	7	3
Ribosome-binding ATPase YchF	Q5ZS65	7	6	21
3-methyl-2-oxobutanoate hydroxymethyltransferase	Q5ZS58	7	6	4
2,3,4,5-tetrahydropyridine-2,6-dicarboxylate N-succinyltransferase	Q5ZX45	7	6	4
Phosphoribosylformylglycinamidine synthase subunit PurL	Q5ZUW4	7	6	3
Long chain fatty acid-CoA ligase	Q5ZV86	7	5	11
Single stranded DNA specific exonuclease RecJ	Q5ZVH9	7	5	9
Phospho-2-dehydro-3-deoxyheptonate aldolase	Q5ZTY1	7	5	6
Lipoprotein	Q5ZYS1	7	5	6
2-dehydro-3-deoxyphosphooctonate aldolase	Q5ZWA3	7	5	5
Uncharacterized protein	Q5ZVK9	7	4	11
Hypothetical transporter	Q5ZX55	7	4	9
Outer-membrane lipoprotein LolB	Q5ZY27	7	4	9
Succinate semialdehyde dehydrogenase	Q5ZTB1	7	4	8
Stress-induced protein	Q5ZTZ7	7	4	4
NADPH-dependent 7-cyano-7-deazaguanine reductase	Q5ZXW5	7	4	3
ABC transporter, permease	Q5ZXX9	7	4	3
ATP transporter, ABC binding component, ATP-binding protein	Q5ZXX8	7	2	9
Uncharacterized protein	Q5ZSJ1	7	2	4
Purine nucleoside phosphorylase	Q5ZVK6	7	2	2
Autotransporter domain-containing protein	Q5ZUQ5	7	2	1
Orotidine 5'-phosphate decarboxylase	Q5ZVL5	7	2	1
Malate oxidoreductase	Q5ZW08	7	1	12
Ankyrin repeat-containing protein	Q5ZY89	7		2
Acyl CoA transferase/carnitine dehydratase	Q5ZZ23	7		1
Malate dehydrogenase (NAD-linked), malic enzyme	Q5ZRB1	6	25	11
3-hydroxybutyrate dehydrogenase	Q5ZT49	6	20	9
Acetyoacetyl CoA reductase	Q5ZY15	6	17	11
Putative mevalonate kinase	Q5ZTW9	6	15	5
Protein translocase subunit SecY	Q5ZYM3	6	14	10
Octanoyltransferase	Q5ZVC9	6	14	3
Phosphate starvation-inducible protein PhoH	Q5ZVJ9	6	12	11
APH domain-containing protein	Q5ZXG4	6	12	5
Uncharacterized protein	Q5ZT52	6	10	8
Lipid-A-disaccharide synthase 2	Q5ZRD7	6	10	2
50S ribosomal protein L9	Q5ZV51	6	9	10
3'-nucleotidase/nuclease	Q5ZV70	6	9	10
Imidazole glycerol phosphate synthase subunit HisH 1	Q5ZXI1	6	9	5
Holliday junction ATP-dependent DNA helicase RuvA	Q5ZW00	6	9	4
Ribonuclease HII	Q5ZVR7	6	9	2
Electron transfer flavoprotein, alpha subunit	Q5ZX10	6	8	13
Transcriptional regulator, LysR family	Q5ZYY8	6	8	8
DNA repair protein RecN	Q5ZRQ6	6	8	5
Hydrogenase maturation factor	Q5ZSP5	6	8	2
Outer membrane protein MIP	Q5ZXE0	6	7	11
Multidrug resistance protein	Q5ZXL1	6	6	20
Nucleotide binding protein FliI	Q5ZUN6	6	6	19
6-phosphogluconolactonase	Q5ZYF5	6	6	12
Uridylate kinase	Q5ZUT0	6	6	7
2-oxoglutarate ferredoxin oxidoreductase beta subunit	Q5ZWY6	6	6	7
33 kDa chaperonin	Q5ZRR3	6	6	6
Probable membrane protein YdgA-like	Q5ZY32	6	6	6
Enoyl CoA hydratase/isomerase (Crotonase)	Q5ZUH0	6	6	5
Acetyl-CoA carboxylase, biotin carboxylase subunit	Q5ZS55	6	6	4
Rhodanese domain protein	Q5ZUE8	6	6	2
Ribosomal RNA large subunit methyltransferase K/L	Q5ZZI8	6	6	1
Major outer membrane protein	Q5ZRC2	6	5	18
Proline iminopeptidase	Q5ZUF5	6	5	8
Ornithine cyclodeaminase	Q5ZTG6	6	5	7
23S rRNA (uracil(1939)-C(5))-methyltransferase RlmD	Q5ZVI4	6	5	6
Uncharacterized protein	Q5ZVB4	6	5	5
Aspartyl/glutamyl-tRNA(Asn/Gln) amidotransferase subunit B	Q5ZUQ6	6	5	4
Multidrug resistance secretion protein	Q5ZYV4	6	5	4
(AraC family) transcriptional regulator	Q5ZTJ8	6	5	2
Acyl carrier protein	Q5ZVP4	6	5	2
DUF5638 domain-containing protein	Q5ZT91	6	5	1
Outer membrane protein, OmpA family protein lpg0657	Q5ZXS4	6	4	16
ABC transporter ATP binding protein	Q5ZW11	6	4	11
UDP-N-acetylmuramate--L-alanyl-gamma-D-glutamyl-meso-2,6-diaminoheptandioate ligase	Q5ZUP0	6	4	8
O-methyltransferase, SAM-dependent	Q5ZT85	6	4	6
Thiopurine S-methyltransferase	Q5ZRP5	6	4	3
Transcriptional regulatory protein	Q5ZVN0	6	4	3
Dual-specificity RNA methyltransferase RlmN	Q5ZV93	6	4	2
Uncharacterized protein	Q5ZWR9	6	3	9
Ribonuclease, T2 family	Q5ZRN2	6	3	8
Hypothetical, SCO1/SenC family protein	Q5ZYF9	6	3	8
L-serine dehydratase (Iron, sulfur-dependent)	Q5ZXE1	6	3	6
3-hydroxy-3-methylglutaryl coenzyme A reductase	Q5ZTV6	6	3	5
Uncharacterized protein	Q5ZSR4	6	3	3
Fumarylacetoacetate hydrolase	Q5ZT83	6	3	3
RNA polymerase-associated protein RapA	Q5ZT66	6	3	1
Ornithine carbamoyltransferase	Q5ZY76	6	3	1
Carbonic anhydrase Mig5	Q5ZSL7	6	2	5
Hydrolase, isochorismatase family	Q5ZX29	6	2	2
Uncharacterized protein	Q5ZXB7	6	1	3
Hydrogenase expression/formation protein HypE	Q5ZSP6	6	1	2
Bifunctional protein GlmU	Q5ZRK6	6		2
Alpha/beta hydrolase	Q5ZV18	5	20	6
Toluene tolerance ABC transporter, ATP binding protein Ttg2A	Q5ZX91	5	17	4
TPR domain protein	Q5ZSN2	5	15	5
Sensor kinase HydH	Q5ZUN0	5	14	3
2-acylglycerophosphoethanolamine acyltransferase	Q5ZXY3	5	13	7
tRNA-(Ms(2)io(6)a)-hydrolase(TRNA hydroxylase)	Q5ZV90	5	12	3
Uncharacterized protein	Q5ZRW5	5	9	3
Deoxyguanosinetriphosphate triphosphohydrolase-like protein	Q5ZUC7	5	8	7
Recombination protein RecR	Q5ZRX0	5	8	4
Sensory box histidine kinase/response regulator	Q5ZU95	5	7	21
dCTP deaminase	Q5ZRC6	5	7	9
DNA helicase, SNF2/RAD54 family domain protein	Q5ZXJ6	5	7	7
CapM protein, capsular polysaccharide biosynthesis	Q5ZRI2	5	7	6
Uncharacterized protein	Q5ZX33	5	7	6
VipA	Q5ZYI2	5	7	6
IcmW	Q5ZS31	5	7	5
Metal dependent phosphoesterase	Q5ZVJ8	5	7	1
30S ribosomal protein S15	Q5ZRV7	5	6	9
Phosphatidylethanolamine N-methyltransferase	Q5ZTK3	5	6	7
50S ribosomal protein L7/L12	Q5ZYQ1	5	5	7
2-octaprenyl-6-methoxyphenol hydroxylase	Q5ZZD3	5	5	5
NADH dehydrogenase I, E subunit	Q5ZRU2	5	5	3
ATP dependent RNA helicase DbpA	Q5ZTN9	5	5	2
Methionine import ATP-binding protein MetN	Q5ZUG5	5	5	2
Type III pantothenate kinase	Q5ZX22	5	5	1
UDP-N-acetylmuramoylalanine--D-glutamate ligase	Q5ZSA3	5	4	9
Uncharacterized protein	Q5ZRD2	5	4	3
Succinate semialdehyde dehyrogenase (NADP+)	Q5ZV57	5	4	3
Methionine aminopeptidase	Q5ZUS3	5	4	2
Cysteine--tRNA ligase	Q5ZVY1	5	3	10
Riboflavin biosynthesis protein RibBA	Q5ZWA6	5	3	7
Multifunctional fusion protein	Q5ZS19	5	3	6
Probable cytosol aminopeptidase	Q5ZS88	5	3	6
L-aspartate oxidase	Q5ZXD2	5	3	6
Riboflavin biosynthesis protein RibD	Q5ZWA8	5	3	4
SPOR domain-containing protein	Q5ZTX8	5	3	3
Glutamate rich protein GrpB	Q5ZV28	5	3	3
tRNA-specific 2-thiouridylase MnmA	Q5ZVQ1	5	3	2
Transmembrane protein	Q5ZZJ6	5	3	2
Thiol:disulfide interchange protein	Q5ZZ88	5	2	9
Metallopeptidase PepO, peptidase, M13 family	Q5ZSB2	5	2	7
Peptide deformylase	Q5ZSC4	5	2	5
Malate oxidoreductase	Q5ZXT0	5	2	5
Heme chaperone HemW	Q5ZT11	5	2	2
Probable transcriptional regulatory protein lpg1286	Q5ZW02	5	2	2
Acetylornithine deacetylase	Q5ZWC1	5	2	2
Uncharacterized protein	Q5ZZ39	5	2	2
ABC transporter ATP binding protein	Q5ZU02	5	1	8
UPF0758 protein lpg2489	Q5ZSM8	5	1	5
FMN-dependent NADH-azoreductase	Q5ZT75	5	1	3
Cytosolic IMP-GMP specific 5'-nucleotidase	Q5ZZB6	5	1	1
Methylase	Q5ZZF0	5	1	1
Phosphate acyltransferase	Q5ZVP8	5		2
Small HspC2 heat shock protein	Q5ZTH0	4	14	14
RNA polymerase sigma factor RpoS	Q5ZW04	4	13	6
Uncharacterized protein	Q5ZYJ7	4	13	3
Pyruvate decarboxylase	Q5ZWD0	4	11	5
Uncharacterized protein	Q5ZUP2	4	10	9
Pyoverdine biosynthesis regulatory gene SyrP-like	Q5ZU71	4	10	3
Methoxymalonyl CoA synthase	Q5ZU72	4	9	8
Phosphate acetyl/butyryltransferase family protein includes: (Dehydratase mit MaoC domain	Q5ZTA1	4	9	6
Uncharacterized protein	Q5ZYR7	4	9	4
ABC transporter, ATP binding protein	Q5ZRF9	4	9	2
Uncharacterized protein	Q5ZZ20	4	9	1
ABC transporter, ATP binding protein	Q5ZZ89	4	8	7
Glycerol-3-phosphate acyltransferase	Q5ZT09	4	6	6
Uncharacterized protein	Q5ZXW8	4	6	6
Methylated DNA protein cysteine S-methyltransferase	Q5ZYH8	4	6	6
3-oxoacyl-(Acyl carrier protein) reductase	Q5ZX28	4	6	5
Purine nucleoside phosphorylase II	Q5ZVM4	4	6	2
NG,NG-dimethylarginine dimethylaminohydrolase	Q5ZUY5	4	5	7
Peptidoglycan D,D-transpeptidase MrdA	Q5ZVR5	4	5	5
ABC transporter, ATP binding component	Q5ZYI4	4	5	5
Glutathione synthetase	Q5ZUF2	4	5	4
4-aminobutyrate aminotransferase	Q5ZYX2	4	5	4
Uncharacterized protein	Q5ZUE7	4	5	3
Sporulation protein	Q5ZRR8	4	5	2
Protoporphyrinogen oxidase	Q5ZRM9	4	5	1
Phosphoribosylformylglycinamidine cyclo-ligase	Q5ZUW5	4	4	4
30S ribosomal protein S20	Q5ZS83	4	4	3
ATP synthase epsilon chain	Q5ZRA2	4	4	3
Cellobiose phosphorylase	Q5ZSN7	4	4	2
Glycosyltransferase, group 2 family protein (Glycan biosynthesis)	Q5ZSN9	4	4	1
Uncharacterized protein	Q5ZSV5	4	4	1
Oxidoreductase, short chain dehydrogenase/reductase family	Q5ZUW0	4	4	1
Peptide chain release factor 3	Q5ZX60	4	3	12
Uncharacterized protein	Q5ZRM7	4	3	9
3-hydroxyisobutyryl Coenzyme A hydrolase	Q5ZX63	4	3	8
Peroxiredoxin, AhpC/TSA family protein	Q5ZRP0	4	3	7
Deoxyribonuclease TatD	Q5ZVN8	4	3	6
Uncharacterized protein	Q5ZYJ8	4	3	6
50S ribosomal protein L34	Q5ZR78	4	3	5
Ferredoxin 2Fe-2S protein	Q5ZS11	4	3	5
Triosephosphate isomerase	Q5ZRT6	4	3	4
Indole-3-glycerol phosphate synthase	Q5ZX99	4	3	4
Thymidine kinase	Q5ZXU5	4	3	3
Oxaloacetate decarboxylase alpha subunit	Q5ZYA6	4	3	3
Elongation factor P	Q5ZYS4	4	3	3
NUDIX hydrolase	Q5ZT12	4	3	2
Two component histidine kinase, GGDEF domain protein/EAL domain protein	Q5ZXA3	4	3	2
GTP cyclohydrolase 1	Q5ZRW0	4	3	1
Carbamoyltransferase HypF	Q5ZSP3	4	3	1
Bifunctional protein FolD	Q5ZVZ1	4	3	1
Glycosyltransferase	Q5ZXF2	4	3	1
Glutathione reductase	Q5ZY02	4	3	1
ATP synthase subunit b	Q5ZR97	4	3	1
Cytochrome c	Q5ZRI3	4	2	12
Outer membrane protein assembly factor BamB	Q5ZV98	4	2	11
HIT family hydrolase	Q5ZRW1	4	2	6
Outer membrane efflux protein (RND multidrug efflux)	Q5ZSK3	4	2	6
Adenylate kinase	Q5ZVM9	4	2	6
Signal recognition particle receptor FtsY	Q5ZS49	4	2	5
L-threonine 3-dehydrogenase	Q5ZXM9	4	2	5
Uncharacterized protein	Q5ZUU5	4	2	4
UDP-N-acetylmuramoyl-L-alanyl-D-glutamate--2,6-diaminopimelate ligase	Q5ZX16	4	2	4
Hypothetical with two candidate membrane-spanning segments	Q5ZS37	4	2	2
Orotate phosphoribosyltransferase	Q5ZW83	4	2	2
3-dehydroquinate synthase	Q5ZX00	4	2	2
tRNA-cytidine(32) 2-sulfurtransferase	Q5ZXN3	4	2	2
N-acetyltransferase domain-containing protein	Q5ZY58	4	2	2
Oligoketide cyclase/lipid transporter protein	Q5ZYK2	4	2	2
N5-carboxyaminoimidazole ribonucleotide synthase	Q5ZYZ4	4	2	2
Acyl CoA dehydrogenase, short chain specific	Q5ZXC9	4	2	1
Lipid A biosynthesis acyltransferase	Q5ZYK9	4	2	1
Cell shape-determining protein MreC	Q5ZXC0	4	1	11
Diaminopimelate epimerase	Q5ZYK6	4	1	7
Outer membrane protein assembly factor BamD	Q5ZWA0	4	1	6
Glycerol-3-phosphate dehydrogenase	Q5ZVM7	4	1	5
Uncharacterized protein	Q5ZSL0	4	1	4
UPF0234 protein lpg1167	Q5ZWB8	4	1	3
3-deoxy-D-manno-octulosonate 8-phosphate phosphatase KdsC	Q5ZX93	4	1	3
Uncharacterized protein	Q5ZXG5	4	1	3
Homogentisate 1,2-dioxygenase	Q9S4T0	4	1	2
Sensory box protein/GGDEF/EAL domains	Q5ZX42	4		9
Peptide chain release factor 1	Q5ZT29	4		7
2,3-bisphosphoglycerate-independent phosphoglycerate mutase	Q5ZY71	4		3
IcmL-like	Q5ZZ91	4		2
Acetoacetate decarboxylase ADC	Q5ZXQ9	3	25	2
DUF4116 domain-containing protein	Q5ZSV7	3	24	2
Hypothetical, patatin-like phospholipase	Q5ZSV6	3	19	1
Uncharacterized protein	Q5ZWQ3	3	18	14
Probable hydrolase	Q5ZS53	3	17	5
Acetylpolyamine aminohydolase	Q5ZTF0	3	13	2
Acetyltransferase	Q5ZW77	3	13	2
PIN_12 domain-containing protein	Q5ZZ60	3	13	2
Interaptin	Q5ZRT5	3	11	2
Acetyoacetyl CoA reductase	Q5ZY14	3	9	4
Lipopolysaccharide assembly protein B	Q5ZVL7	3	9	2
Enhanced entry protein EnhB	Q5ZS79	3	8	5
Uncharacterized protein	Q5ZTT9	3	8	4
Flagellar motor switch protein FliM	Q5ZUK6	3	8	2
Transmembrane protein	Q5ZT48	3	8	1
Potassium efflux system KefA	Q5ZV79	3	7	3
Uncharacterized protein	Q5ZWH9	3	7	2
Uncharacterized protein	Q5ZTK6	3	7	1
Translation initiation factor IF-3	Q5ZS06	3	6	4
Uncharacterized protein	Q5ZT98	3	6	2
Chitinase	Q5ZWG9	3	5	9
Uncharacterized protein	Q5ZT40	3	5	3
YkuD domain-containing protein	Q5ZV58	3	5	3
Probable septum site-determining protein MinC	Q5ZV87	3	5	3
Flagellar P-ring protein	Q5ZW64	3	5	3
Glutamine amidotransferase, class I	Q5ZTB3	3	5	2
ATP synthase subunit b	Q5ZWN6	3	5	2
Competence damage inducible protein CinA	Q5ZS71	3	4	6
Porphobilinogen deaminase	Q5ZRY6	3	4	5
Glycine--tRNA ligase alpha subunit	Q5ZUF8	3	4	5
Uncharacterized protein	Q5ZSE7	3	4	4
Dipeptidyl aminopeptidase/acylaminoacyl peptidase	Q5ZXQ1	3	4	3
DNA mismatch repair protein MutL	Q5ZS22	3	4	2
D-isomer specific 2-hydroxyacid dehydrogenase	Q5ZS40	3	4	2
[Ribosomal protein S18]-alanine N-acetyltransferase	Q5ZVD9	3	4	2
Glutamate-cysteine ligase	Q5ZUF1	3	3	8
NAD(P) transhydrogenase subunit beta	Q5ZX58	3	3	5
Leucine aminopeptidase	Q5ZS85	3	3	5
Glutamate-1-semialdehyde 2,1-aminomutase	Q5ZVA6	3	3	4
Translation factor	Q5ZVJ7	3	3	4
(Two component) response regulator	Q5ZRY9	3	3	3
(Outer) membrane protein	Q5ZXM4	3	3	3
DUF853 domain-containing protein	Q5ZYU2	3	3	3
2-methylisocitrate lyase	Q5ZZF8	3	3	3
Dihydroorotase	Q5ZRB9	3	3	2
Dienelactone hydrolase family protein	Q5ZS34	3	3	1
Octaprenyl diphosphate synthase IspB	Q5ZS63	3	3	1
ATP-dependent DNA helicase (UvrD/Rep helicase)	Q5ZUI6	3	3	1
Type I secretion system LssZ	Q5ZVC7	3	3	1
Uncharacterized protein	Q5ZZ22	3	3	1
Uracil phosphoribosyltransferase	Q5ZTB9	3	2	8
Thaumatin domain-containing protein	Q5ZVW1	3	2	7
Metallo-beta-lactamase superfamily protein	Q5ZTA6	3	2	6
Aspartate carbamoyltransferase	Q5ZXZ2	3	2	6
Homospermidine synthase	Q5ZSM2	3	2	5
YkuD domain-containing protein	Q5ZV45	3	2	5
Oxygen-dependent coproporphyrinogen-III oxidase	Q5ZW72	3	2	5
DNA ligase	Q5ZWX6	3	2	4
Glycosyl transferase	Q5ZXF3	3	2	4
50S ribosomal protein L3 glutamine methyltransferase	Q5ZT61	3	2	3
Uncharacterized protein	Q5ZX07	3	2	3
Uncharacterized protein	Q5ZXV7	3	2	3
RNA pyrophosphohydrolase	Q5ZRK9	3	2	2
Arginine N-succinyltransferase	Q5ZUT6	3	2	2
Iron-sulfur cluster insertion protein ErpA	Q5ZVQ2	3	2	2
Two component sensor kinase	Q5ZVZ7	3	2	2
Transcriptional repressor NrdR	Q5ZXK5	3	2	2
Formimidoylglutamase	Q5ZXM2	3	2	2
WaaM	Q5ZRE1	3	2	1
Uncharacterized protein	Q5ZUI9	3	2	1
Purine/pyrimidine phosphoribosyltransferase	Q5ZVC1	3	2	1
Uncharacterized protein	Q5ZT45	3	1	8
Phosphoenolpyruvate protein phosphotransferase PtsP	Q5ZRL0	3	1	5
Universal stress protein	Q5ZWZ8	3	1	5
D-alanine-aminotransferase	Q5ZVD0	3	1	4
3-oxoacyl-(Acyl carrier protein) reductase	Q5ZVP5	3	1	4
3-hydroxyisobutyryl Coenzyme A hydrolase	Q5ZX62	3	1	4
Transcription-repair-coupling factor	Q5ZWY0	3	1	3
Rhodanese domain protein	Q5ZUM4	3	1	2
Tol-Pal system protein TolQ	Q5ZV66	3	1	2
Ubiquinone/menaquinone biosynthesis C-methyltransferase UbiE	Q5ZRH9	3	1	1
Cytochrome c oxidase subunit 1	Q5ZRI5	3	1	1
7-cyano-7-deazaguanine synthase	Q5ZRJ5	3	1	1
Uncharacterized protein	Q5ZTB4	3	1	1
Uncharacterized protein	Q5ZTC0	3	1	1
Type II secretion system protein L	Q5ZUD0	3	1	1
Succinyl-diaminopimelate desuccinylase	Q5ZX46	3	1	1
Phosphopantetheine-protein transferase	Q5ZXE7	3	1	1
ATP-dependent DNA helicase	Q5ZSF8	3		3
RNA polymerase-binding transcription factor DksA	Q5ZT27	3		2
Adenosine deaminase	Q5ZY75	3		2
Uncharacterized protein	Q5ZSE0	3		1
7-carboxy-7-deazaguanine synthase	Q5ZTW7	3		1
YceI domain-containing protein	Q5ZUZ5	3		1
Cold shock domain family protein CspA	Q5ZW82	3		1
Glucoamylase	Q5ZYF0	3		1
Leucine aminopeptidase	Q5ZZH8	3		1
Uncharacterized protein	Q5ZWW5	2	44	16
Stomatin like transmembrane protein	Q5ZRC5	2	31	11
Small heat shock protein HspC2	Q5ZSM4	2	30	27
Polyhydroxyalkanoic synthase	Q5ZWI8	2	15	3
IcmP (DotM)	Q5ZYC7	2	14	3
RND efflux membrane fusion protein, acriflavin resistance protein E	Q5ZXL0	2	13	14
Sensory box (GGDEF/EAL domain) regulatory protein	Q5ZZI1	2	11	2
Glutathione S-transferase	Q5ZSS6	2	10	1
Sensory box protein, GGDEF family protein, LssE	Q5ZYT4	2	10	1
Lipid-A-disaccharide synthase 1	Q5ZVR9	2	8	5
Potassium efflux system KefA	Q5ZVG1	2	8	1
Patatin family protein	Q5ZRS3	2	7	6
ABC transporter, ATP binding protein	Q5ZTW2	2	7	3
LphA (DotK)	Q5ZYC5	2	6	10
Exodeoxyribonuclease III	Q5ZXT3	2	6	6
IcmJ (DotN)	Q5ZYB7	2	6	4
Inorganic pyrophosphatase	Q5ZRW2	2	6	3
Microtubule binding protein, putative	Q5ZUC3	2	6	3
RNA-splicing ligase RtcB	Q5ZTG1	2	6	2
Inositol-1-monophosphatase	Q5ZUP5	2	6	2
Type IV pilus biogenesis protein PilM	Q5ZX06	2	5	6
tRNA pseudouridine synthase B	Q5ZRV6	2	5	2
Mg2+ and Co2+ transporter CorB, hemolysin	Q5ZRW3	2	5	1
2-polyprenyl-6-methoxyphenol hydroxylase	Q5ZZD2	2	4	8
SdeD	Q5ZSK8	2	4	6
Neurogenic locus notch protein homolog	Q5ZXA9	2	4	3
Uncharacterized protein	Q5ZZ79	2	4	3
Primosomal protein N'	Q5ZRL5	2	4	2
Glutamate synthase	Q5ZZD7	2	4	2
Site-determining protein	Q5ZUL0	2	4	1
AAA_28 domain-containing protein	Q5ZW74	2	4	1
ABC transporter, ATP binding protein	Q5ZX96	2	4	1
Uncharacterized protein	Q5ZXI9	2	4	1
Peptidoglycan D,D-transpeptidase FtsI	Q5ZX17	2	3	9
Transcription elongation factor GreA	Q5ZS95	2	3	6
N-terminal acetyltransferase, GNAT family	Q5ZZA8	2	3	5
Conserved domain protein	Q5ZZC0	2	3	5
Glutamate racemase	Q5ZT55	2	3	2
Transposase Tn5	Q5ZTU2	2	3	2
3-deoxy-manno-octulosonate cytidylyltransferase	Q5ZU88	2	3	2
Uncharacterized protein	Q5ZUW3	2	3	2
Aldo/keto reductases	Q5ZY55	2	3	2
Fructose bisphosphate aldolase	Q5ZYA2	2	3	2
Pyridoxine 5'-phosphate synthase	Q3V870	2	3	2
Zinc protease (Peptidase, M16 family)	Q5ZS48	2	3	1
D-aminoacyl-tRNA deacylase	Q5ZUF4	2	3	1
Hydrolase	Q5ZUR6	2	3	1
Mercuric reductase	Q5ZV78	2	3	1
Oxidoreductase	Q5ZVW7	2	3	1
Methyltransferase	Q5ZWJ6	2	3	1
Hypothetical phosphate transport regulator	Q5ZXZ6	2	3	1
Fis transcriptional activator	Q5ZUQ0	2	2	4
Metal ion transporter	Q5ZXX0	2	2	4
OMP_b-brl domain-containing protein	Q5ZZB0	2	2	4
Protein-export membrane protein SecF	Q5ZU08	2	2	3
Transmembrane protein	Q5ZWX9	2	2	3
Ferrochelatase	Q5ZYE7	2	2	3
GTPase HflX	Q5ZZK0	2	2	3
OmpA-like transmembrane domain protein	Q5ZWC3	2	2	2
Thioredoxin reductase	Q5ZUM6	2	2	2
Ubiquinone biosynthesis O-methyltransferase	Q5ZUU3	2	2	2
Lipase A	Q5ZVI8	2	2	2
Ribosomal RNA large subunit methyltransferase J	Q5ZVZ2	2	2	2
Flagellar L-ring protein	Q5ZW65	2	2	2
1-acyl-sn-glycerol-3-phosphate acyltransferase	Q5ZX44	2	2	2
Bifunctional purine biosynthesis protein PurH	Q5ZYB2	2	2	2
Multifunctional CCA protein	Q5ZRX9	2	2	1
Sterol desaturase	Q5ZTC7	2	2	1
tRNA (cytidine/uridine-2'-O-)-methyltransferase TrmJ	Q5ZUP6	2	2	1
Bifunctional uridylyltransferase/uridylyl-removing enzyme	Q5ZUS2	2	2	1
Uncharacterized protein	Q5ZW15	2	2	1
Acyl-[acyl-carrier-protein]--UDP-N-acetylglucosamine O-acyltransferase	Q5ZY61	2	2	1
Lysophospholipase A	Q5ZT22	2	1	8
Lipoprotein ABC transporter	Q5ZT77	2	1	8
Hypothetical signal peptide protein	Q5ZXJ4	2	1	8
Uncharacterized protein	Q5ZXK9	2	1	8
Cytidylate kinase	Q5ZVM0	2	1	5
Tryptophan synthase alpha chain	Q5ZVY3	2	1	5
1-acyl-sn-glycerol-3-phosphate acetyltransferase	Q5ZY23	2	1	5
Leucine-, isoleucine-, valine-, threonine-, and alanine-binding protein	Q5ZY74	2	1	5
Fumarate hydratase class II	Q5ZRE5	2	1	4
Tetraacyldisaccharide 4'-kinase	Q5ZUI0	2	1	3
Uncharacterized protein	Q5ZXP1	2	1	3
Superoxide dismutase [Fe]	P31108	2	1	3
Phosphatidylserine decarboxylase proenzyme	Q5ZRA9	2	1	2
Hemin binding protein Hbp	Q5ZTE9	2	1	2
Uncharacterized protein	Q5ZUI4	2	1	2
2-amino-4-hydroxy-6-hydroxymethyldihydropteridine pyrophosphokinase FolK	Q5ZVA1	2	1	2
Uncharacterized protein	Q5ZX59	2	1	2
Glutamine-dependent NAD(+) synthetase	Q5ZXJ7	2	1	2
Uncharacterized protein	Q5ZYJ5	2	1	2
Dihydropteroate synthase	Q5ZRT3	2	1	1
Peptide aspartate b-dioxygenase	Q5ZSQ4	2	1	1
Signal peptidase I	Q5ZUD3	2	1	1
Ribosomal RNA small subunit methyltransferase H	Q5ZX19	2	1	1
Adenylosuccinate lyase	Q5ZXD1	2	1	1
Uncharacterized protein	Q5ZXF7	2	1	1
Endo-1,4 beta-glucanase	Q5ZY90	2	1	1
3-hydroxyisobutyrate dehydrogenase	Q5ZZ83	2	1	1
Hemin binding protein Hbp	Q5ZZI6	2	1	1
Lytic murein transglycosylase	Q5ZRG4	2		4
Methyltranfer_dom domain-containing protein	Q5ZS41	2		3
Lipoprotein VacJ-like	Q5ZUF3	2		3
Probable monothiol glutaredoxin GrlA	Q48833	2		3
Metal-activated pyridoxal enzyme	Q5ZSJ5	2		2
Transmembrane protein	Q5ZV97	2		2
Transcriptional regulatory protein CpxR	Q5ZVK2	2		2
Periplasmic serine endoprotease DegP-like	Q5ZVV9	2		2
Type II secretory pathway protein E	Q5ZVW9	2		2
Methionyl-tRNA formyltransferase	Q5ZSC5	2		1
Uncharacterized protein	Q5ZSY0	2		1
Mevalonate diphosphate decarboxylase	Q5ZTW8	2		1
ATP-dependent DNA helicase RecG	Q5ZTX5	2		1
Uncharacterized protein	Q5ZU44	2		1
Uncharacterized protein	Q5ZUI1	2		1
Phosphoribosylamine--glycine ligase	Q5ZUW9	2		1
Cadmium efflux ATPase	Q5ZWS5	2		1
Phosphopentomutase	Q5ZXU2	2		1
Nitrogen fixation protein (Fe-S cluster formation) NifU	Q5ZXX5	2		1
Multidrug resistance protein	Q5ZZJ5	2		1
Uncharacterized protein	Q5ZRR2	1	11	1
Kynurenine 3-monooxygenase	Q5ZX41	1	10	2
Uncharacterized protein	Q5ZV91	1	8	3
Uncharacterized protein	Q5ZRQ2	1	8	1
Glutamate--cysteine ligase	Q5ZYJ4	1	7	3
NAD-glutamate dehydrogenase	Q5ZYW6	1	7	3
Malonate decarboxylase alpha subunit	Q5ZSU0	1	7	2
Uncharacterized protein	Q5ZV03	1	7	1
UPF0229 protein lpg2811	Q5ZRR9	1	6	3
UPF0422 protein lpg2959	Q5ZRC3	1	5	6
5-carboxyvanillate decarboxylase	Q5ZSI0	1	5	2
Lipoprotein	Q5ZVC6	1	4	10
Adenosine monophosphate-protein hydrolase SidD	Q5ZSQ2	1	4	3
Uncharacterized protein	Q5ZTE2	1	4	3
Uncharacterized protein	Q5ZYR1	1	4	3
Hypothetical membrane protein	Q5ZVI2	1	4	2
Ribosome maturation factor RimP	Q5ZRV2	1	4	1
Deoxyuridine 5'-triphosphate nucleotidohydrolase	Q5ZSN0	1	4	1
IcmL (DotI)	Q5ZYC3	1	3	5
UPF0176 protein lpg2838	Q5ZRP2	1	3	3
Heat shock hsp20	Q5ZZ19	1	3	3
Hypothetical exported protein	Q5ZXR2	1	3	2
(Type IV) pilus assembly protein PilB	Q5ZVB8	1	3	1
Uncharacterized protein	Q5ZXE3	1	2	4
Signal peptide protein, LysM domain protein	Q5ZSC3	1	2	3
NADH dehydrogenase I, L subunit	Q5ZRU9	1	2	2
tRNA N6-adenosine threonylcarbamoyltransferase	Q5ZT08	1	2	2
Acyltransferase	Q5ZT97	1	2	2
Bacterial extracellular solute-binding protein	Q5ZWX5	1	2	2
5-formyltetrahydrofolate cyclo-ligase	Q5ZXY7	1	2	2
Bacteriophage related DNA polymerase	Q5ZYU9	1	2	2
Carrier/transport protein	Q5ZWY5	1	2	1
Sensor protein LuxN	Q5ZRY7	1	2	1
Pirin	Q5ZT76	1	2	1
Hypothetical phage AbiD protein	Q5ZTP6	1	2	1
Protein GrpE	Q5ZTY2	1	2	1
Carrier domain-containing protein	Q5ZU65	1	2	1
Uncharacterized protein	Q5ZUJ5	1	2	1
Uncharacterized protein	Q5ZVC0	1	2	1
Uncharacterized protein	Q5ZW97	1	2	1
ATP-dependent protease subunit HslV	Q5ZXU1	1	2	1
Sigma-54 modulation protein	Q5ZY96	1	2	1
Multifunctional: 2-keto-3-deoxygluconate 6-phosphate aldolase/(4-hydroxy-2-oxoglutarate aldolase)	Q5ZYF2	1	2	1
Uncharacterized protein	Q5ZYJ1	1	2	1
UPF0145 protein lpg0197	Q5ZZ14	1	2	1
Uncharacterized protein	Q5ZZ98	1	2	1
Uncharacterized protein	Q5ZR83	1	2	1
UPF0102 protein lpg2994	Q5ZR89	1	2	1
Outer membrane protein TolC	Q5ZXN2	1	1	8
Phenol hydroxylase	Q5ZYA1	1	1	6
Bifunctional glutamine synthetase adenylyltransferase/adenylyl-removing enzyme	Q5ZXQ2	1	1	4
IcmT	Q5ZYD1	1	1	3
Nitrogen regulatory P-II transcription regulator	Q5ZXY8	1	1	3
Hypothetical phosphotransferase	Q5ZYR5	1	1	3
IcmV	Q5ZS32	1	1	2
CDP-diacylglycerol-serine-O-phosphatidyltransferase	Q5ZY98	1	1	2
DnaA-like family protein	Q5ZRS8	1	1	2
Endolytic peptidoglycan transglycosylase RlpA	Q5ZSG3	1	1	2
Histidinol-phosphate aminotransferase 2	Q5ZU10	1	1	2
Glutathione-regulated potassium efflux system	Q5ZUB0	1	1	2
Uncharacterized protein	Q5ZW78	1	1	2
Riboflavin biosynthesis protein	Q5ZWZ7	1	1	2
Exodeoxyribonuclease 7 large subunit	Q5ZXA6	1	1	2
CMP-N,N'-diacetyllegionaminic acid synthase	Q5ZXI0	1	1	2
Alanine racemase	Q5ZXJ2	1	1	2
Multicopper oxidase	Q5ZYU6	1	1	2
Uncharacterized protein	Q5ZZC6	1	1	2
Alkaline phosphatase	Q5ZUE6	1		8
Dihydrofolate reductase	Q5ZYR2	1		5
Single-stranded DNA-binding protein	Q5ZYL6	1		3
NAGPA domain-containing protein	Q5ZUM1	1		3
Pseudouridine synthase	Q5ZVV7	1		3
Chaperone SurA	Q5ZYR3	1		3
GTPase Obg	Q5ZS70	1		2
CG18304 gene product	Q5ZT38	1		2
Probable Fe(2+)-trafficking protein	Q5ZU80	1		2
Amidophosphoribosyltransferase	Q5ZUW8	1		2
Uncharacterized protein	Q5ZUX7	1		2
Putative secreted protein	Q5ZV15	1		2
Biotin synthase	Q5ZVG8	1		2
Cytochrome D ubiquinol oxidase, subunit I	Q5ZW85	1		2
Imidazole glycerol-phosphate synthase	Q5ZW92	1		2
Peptidase, M23/M37 family	Q5ZXA7	1		2
Choloylglycine hydrolase	Q5ZXC8	1		2
Sulfate transporter	Q5ZXN4	1		2
Endonuclease/exonuclease/phosphatase family protein	Q5ZYA3	1		2
Sigma 54 modulation protein YhbH	Q5ZW81		12	4
Uncharacterized protein	Q5ZWD1		12	2
Uncharacterized protein	Q5ZTF5		11	5
Uncharacterized protein	Q5ZUP1		7	2
Lipase	Q5ZUB8		6	5
Uncharacterized protein	Q5ZWH4		6	2
Flagellar hook associated protein type 3 FlgL	Q5ZW61		6	1
Uncharacterized protein	Q5ZZD0		5	3
Uncharacterized protein	Q5ZRD6		5	2
Flagellar basal-body rod protein FlgG	Q5ZW66		5	1
ABC transporter ATP-binding protein	Q5ZXP9		5	1
IcmS	Q5ZYD0		4	1
PLD phosphodiesterase domain-containing protein	Q5ZUB9		4	1
Sensory box protein/GGDEF domain/EAL domain	Q5ZVC2		4	1
Uncharacterized protein	Q5ZX37		3	3
tRNA pseudouridine synthase D	Q5ZV19		3	2
Probable protein kinase UbiB	Q5ZRH7		3	1
Aldo/keto reductase	Q5ZRR0		3	1
UPF0434 protein lpg1920	Q5ZU87		3	1
Short chain type dehydrogenase/reductase	Q5ZWE2		3	1
DUF2063 domain-containing protein	Q5ZXR5		3	1
Uncharacterized protein	Q5ZRD0		2	2
Chorismate lyase	Q5ZVL1		2	2
Carboxy-terminal protease	Q5ZY73		2	2
Malonate decarboxylase acyl carrier protein	Q5ZST9		2	1
SsrA-binding protein	Q5ZRP1		2	1
Coenzyme A biosynthesis bifunctional protein CoaBC	Q5ZSM9		2	1
DUF2063 domain-containing protein	Q5ZTA9		2	1
Rho-GAP domain-containing protein	Q5ZUK0		2	1
Uncharacterized protein	Q5ZV39		2	1
Sensor histidine kinase CpxA	Q5ZVK3		2	1
OMP_b-brl domain-containing protein	Q5ZZG8		2	1
ATP synthase subunit delta	Q5ZR98		2	1
Succinyl-diaminopimelate desuccinylase	Q5ZXC3		1	5
Nicotinate-nucleotide pyrophosphorylase	Q5ZXC5		1	5
Acid phosphatase, class B	Q5ZS98		1	3
Uncharacterized protein	Q5ZWK1		1	3
Uncharacterized protein	Q5ZT81		1	2
Uncharacterized protein	Q5ZUL4		1	2
Uncharacterized protein	Q5ZUV5		1	2
Pyridine nucleotide-disulfide oxidoreductase	Q5ZYW7		1	2
Flagellin	Q5ZVV0			317
Uncharacterized protein	Q5ZWU3			16
Exported membrane protein	Q5ZWU4			8
3',5'-cyclic-nucleotide phosphodiesterase	Q5ZU63			5
Uncharacterized protein	Q5ZWU2			5
Pilus assembly protein TraF	Q5ZTS9			3
Copper efflux ATPase	Q5ZV16			3
Pseudouridine synthase	Q5ZVJ3			3
Lipase B	Q5ZWC8			3
Putative exported protein	Q5ZWT5			3
Uncharacterized protein	Q5ZX50			3
Arsenate reductase	Q5ZYW3			3
Peptide transport protein, POT family	Q5ZRS5			2
L-sorbosone dehydrogenase	Q5ZRV9			2
UPF0235 protein lpg2716	Q5ZS04			2
Uncharacterized protein	Q5ZSE9			2
Uncharacterized protein	Q5ZSH1			2
Uncharacterized protein	Q5ZT14			2
Interaptin	Q5ZT54			2
Glycerol-3-phosphate dehydrogenase [NAD(P)+]	Q5ZT56			2
Uncharacterized protein	Q5ZU43			2
Segregation and condensation protein B	Q5ZVJ4			2
Mg2+ and Co2+ transporter CorC	Q5ZVK1			2
Apolipoprotein N-acyltransferase	Q5ZVU1			2
Flagellar hook-associated protein 2	Q5ZVV2			2
Uncharacterized protein	Q5ZWT4			2
Membrane fusion protein	Q5ZX81			2
Uncharacterized protein	Q5ZXD4			2
4-amino-4-deoxychorismate lyase	Q5ZXY5			2
UvrABC system protein B	Q5ZZD9			2
b. The protein content of these sample preparations was analyzed by the use one-dimensional Protein Identification Technology. The data were searched against L. pneumophila (2930 entries in UniProt) protein database. Results were filtered to retain proteins with ≤1% False Discovery Rate (FDR) confidence. The table shows numbers of peptides matched to individual L. pneumophila proteins and lists a…
a. UniProtKB Accession Number
