# Supplementary material for: Structural analysis of the Legionella pneumophila Dot/Icm type IV secretion system core complex
Source: eLife. 2020 Sep 2;9:e59530. doi: 10.7554/eLife.59530 (PMC7511231; doi:10.7554/eLife.59530)
Supplement: Supplementary file 2. — aUniProtKB Accession Number bProteins were identified by searching the MS/MS data against L. pneumophila (UniProt; 2930 entries) using Proteome Discoverer (v2.1, Thermo Scientific). Search parameters included MS1 mass tolerance of 10 ppm and fragment tolerance of 0.1 Da. False discovery rate (FDR) was determined using Percolator and proteins/peptides with a FDR of ≤1% were retained for further analysis.cDot/Icm T4SS components are in bold. [file elife-59530-supp2.xlsx]

## Sheet: Sum Hi FDR >1 PSM 1; >0 PSM >1 
Supplementary File 1: Proteins that copurify with DDotG T4SS
		Spectral Counts b
Identified Proteins	Gene Number a	Prep 1	Prep 2	Prep 3
Flagellin	Q5ZVV0	734	321	301
DNA-directed RNA polymerase subunit beta'	Q5ZYP9	183	319	184
Elongation factor Tu	Q5ZYP5	146	319	150
DNA-directed RNA polymerase subunit beta	Q5ZYQ0	139	263	140
60 kDa chaperonin	Q5ZXP3	98	168	142
Ribonucleoside-diphosphate reductase	Q5ZUL9	92	177	132
Enoyl CoA hydratase	Q5ZV44	89	145	124
50S ribosomal protein L5	Q5ZYN1	88	200	95
Polyketide synthase, type I	Q5ZTH6	88	173	253
Elongation factor G	Q5ZYP6	82	188	92
DNA gyrase subunit A	Q5ZVM3	79	29	24
30S ribosomal protein S4	Q5ZYL9	78	179	57
Ribonuclease E	Q5ZT68	73	183	68
50S ribosomal protein L2	Q5ZYP0	73	180	63
Enhanced entry protein EnhC	Q5ZS80	72	202	148
30S ribosomal protein S12	Q5ZYP8	72	120	28
50S ribosomal protein L4	Q5ZYP2	71	136	58
Dihydrolipoyllysine-residue succinyltransferase component of 2-oxoglutarate dehydrogenase complex	Q5ZY40	65	87	120
30S ribosomal protein S11	Q5ZYM0	63	132	37
Serine protein kinase	Q5ZRS0	63	81	70
Sensory box protein/GGDEF/EAL domains	Q5ZX42	61	5	62
Stomatin like transmembrane protein	Q5ZRC5	60	6	25
2-oxoglutarate dehydrogenase E1 component	Q5ZY41	55	82	124
50S ribosomal protein L1	Q5ZYQ3	54	115	46
30S ribosomal protein S13	Q5ZYM1	54	74	31
NAD-glutamate dehydrogenase	Q5ZV59	52	126	89
30S ribosomal protein S3	Q5ZYN7	51	150	45
Lon protease	Q5ZUE1	51	132	37
50S ribosomal protein L3	Q5ZYP3	50	100	34
Thiolase	Q5ZV43	50	99	76
Elongation factor 4	Q5ZUD2	50	73	46
ATP-dependent zinc metalloprotease FtsH	Q5ZRT2	49	74	129
Cell shape-determining protein MreB	Q5ZXC1	47	143	67
Chaperone protein DnaK	Q5ZTY3	45	118	87
50S ribosomal protein L17	Q5ZYL7	45	83	45
ATP binding protease component ClpA	Q5ZXB4	45	73	83
Carbamoyl-phosphate synthase large chain	Q5ZS94	45	72	88
Major outer membrane protein	Q5ZRC1	44	353	50
30S ribosomal protein S2	Q5ZUS8	44	122	76
50S ribosomal protein L15	Q5ZYM4	44	88	34
Chaperone protein HtpG	Q5ZVS1	44	86	73
Aconitate hydratase A	P37032	44	80	58
50S ribosomal protein L6	Q5ZYM8	44	75	28
Transcription termination factor Rho	Q5ZRE8	43	82	53
ABC transporter, ABC binding protein	Q5ZXM8	43	69	45
Small heat shock protein HspC2	Q5ZSM4	42	7	25
30S ribosomal protein S1	Q5ZVL9	41	72	43
DNA-directed RNA polymerase subunit alpha	Q5ZYL8	41	63	27
Astacin protease	Q5ZR84	41	50	23
Uncharacterized protein	Q5ZWW5	41	15	35
Acyl CoA C-acetyltransferase	Q5ZUH3	40	79	67
ATP synthase subunit beta	Q5ZRA1	39	92	58
Malate dehydrogenase (NAD-linked), malic enzyme	Q5ZRB1	39	15	32
D-alanyl-D-alanine carboxypeptidase, fraction B penicillin binding protein 4	Q5ZSD0	38	110	45
50S ribosomal protein L22	Q5ZYN8	38	88	36
HupB DNA binding protein HU-beta	Q5ZUE2	38	82	16
Global stress protein GspA	Q5ZTH1	38	28	33
Oxidoreductase, acyl CoA dehydrogenase family	Q5ZUR7	37	75	77
Translation initiation factor IF-2	Q5ZRV4	36	106	31
UDP-N-acetylglucosamine 1-carboxyvinyltransferase	Q5ZX85	36	62	61
3-hydroxyacyl CoA dehydrogenase oxidoreductase protein	Q5ZVT8	35	96	62
Protein HflK	Q5ZY88	35	63	68
DNA topoisomerase 1	Q5ZSC0	35	53	24
Zinc metalloprotease	Q5ZYA5	33	226	39
Glutamine synthetase, type I	Q5ZVS6	33	95	67
ATP synthase subunit alpha 2	Q5ZR99	33	79	47
Phosphoenolpyruvate synthase	Q5ZXC7	33	78	75
UDP-N-acetylmuramate--L-alanine ligase	Q5ZSA5	33	71	38
Sensory box protein, GGDEF family protein, LssE	Q5ZYT4	33	8	30
Protein HflC	Q5ZY87	32	55	63
Pyruvate dehydrogenase E1 component	Q5ZVD6	32	53	60
Succinate dehydrogenase flavoprotein subunit	Q5ZY43	31	76	47
Alanine--tRNA ligase	Q5ZUJ9	31	48	53
S-adenosylmethionine synthase	Q5ZTY6	30	62	38
Chaperone protein ClpB	Q5ZUP3	30	34	36
50S ribosomal protein L14	Q5ZYN3	29	74	29
Succinate--CoA ligase [ADP-forming] subunit beta	Q5ZY39	29	62	33
50S ribosomal protein L21	Q5ZS68	29	61	20
IcmF	Q5ZYB4	28	85	72
Malate dehydrogenase	Q5ZT13	28	61	29
Uncharacterized protein	Q5ZZK2	28	59	50
PhoH protein (Phosphate starvation inducible protein)	Q5ZRN8	27	82	50
Uridine kinase	Q5ZUE5	27	61	26
Isoleucine--tRNA ligase	Q5ZWZ6	27	60	26
Citrate synthase	Q5ZVM5	27	28	36
NADH-quinone oxidoreductase	Q5ZRU4	26	103	69
Site-determining protein	Q5ZUR8	26	73	28
Phosphomannomutase	Q5ZSN1	26	59	44
Twitching motility protein PilT	Q5ZTZ5	26	38	28
Acetyltransferase component of pyruvate dehydrogenase complex	Q5ZVD7	26	25	32
Alkyl hydroperoxide reductase AhpD	Q5ZTP9	26	19	18
LPS biosynthesis protein, PseA-like	Q5ZXI3	25	114	43
Tetratricopeptide repeat domain 8	Q5ZXG6	25	78	47
Aspartokinase	Q5ZUI7	25	60	51
DNA gyrase subunit B	Q5ZZK5	25	59	75
30S ribosomal protein S5	Q5ZYM6	25	55	26
50S ribosomal protein L16	Q5ZYN6	25	46	24
UDP-N-acetylenolpyruvoylglucosamine reductase	Q5ZSA6	25	35	22
Sensory box (GGDEF/EAL domain) regulatory protein	Q5ZZI1	25	3	24
Phosphoribosylglycinamide synthetase ATP-grasp (A) domain protein	Q5ZZE4	24	96	37
2,4-dienoyl-CoA reductase FadH1	Q5ZT18	24	86	39
Isocitrate dehydrogenase [NADP]	Q5ZXB6	24	71	34
Protein RecA	Q5ZUJ7	24	69	34
Asparagine--tRNA ligase	Q5ZT80	24	61	44
Cell division ATP-binding protein FtsE	Q5ZS50	24	55	22
GTP pyrophosphokinase ((P)ppGpp synthetase I) stringent stress response RelA	Q5ZVI3	24	52	51
Acetyl-coenzyme A carboxylase carboxyl transferase subunit alpha	Q5ZXE6	24	51	23
Aminomethyltransferase	Q5ZZ93	24	31	27
Signal recognition particle protein	Q5ZYH2	23	75	35
30S ribosomal protein S9	Q5ZS13	23	55	25
Dihydrolipoyl dehydrogenase	Q5ZVD8	23	34	35
ABC transport system periplasmic substrate binding protein	Q5ZTW3	22	65	21
NADH-quinone oxidoreductase subunit D	Q5ZRU1	22	61	41
30S ribosomal protein S7	Q5ZYP7	22	47	25
RND multidrug efflux membrane fusion protein	Q5ZSK4	22	44	15
17kDa common antigen	Q5ZXJ1	22	43	12
D-alanine--D-alanine ligase	Q5ZSA7	22	38	28
GTPase Der	Q5ZV99	22	38	26
Propionyl CoA carboxylase beta subunit	Q5ZUH1	22	35	37
Bifunctional protein PutA	Q5ZUU6	21	58	51
Glutamine--fructose-6-phosphate aminotransferase [isomerizing]	Q5ZRP4	21	56	34
Serine hydroxymethyltransferase	Q5ZXK6	21	52	34
Aminotransferase	Q5ZVI1	21	45	36
Virulence regulator BipA	Q5ZRQ8	21	35	23
30S ribosomal protein S17	Q5ZYN4	21	31	17
NAD-glutamate dehydrogenase	Q5ZYW6	21	1	33
DotA c	Q5ZS33	20	94	63
Membrane-bound lytic murein transglycosylase A	Q5ZU14	20	77	16
Leucine--tRNA ligase	Q5ZVU2	20	73	45
Uncharacterized protein	Q5ZRH0	20	72	44
Glyceraldehyde-3-phosphate dehydrogenase	Q5ZZ73	20	64	23
Cell division protein FtsZ	Q5ZSB0	20	61	21
DegP protease (Do-like, S2-serine-like)	Q5ZX30	19	118	17
DUF2807 domain-containing protein	Q5ZRN3	19	79	27
Uncharacterized protein	Q5ZXU7	19	65	23
Membrane bound lytic murein transglycosylase	Q5ZUD1	19	53	32
ATP-dependent Clp protease ATP-binding subunit ClpX	Q5ZUE0	19	52	36
Phosphoglucosamine mutase	Q5ZRT4	19	49	23
Acetylornithine aminotransferase	Q5ZRB4	19	42	24
Guanosine-3, 5-bis(Diphosphate)-3-pyrophosphohydrolase	Q5ZTZ9	19	40	55
DNA topoisomerase 4 subunit A	Q5ZRA3	19	38	21
Glutaryl CoA dehydrogenase	Q5ZSD9	19	28	27
Acetoacetyl CoA reductase	Q5ZWM6	19	25	18
30S ribosomal protein S14	Q5ZYN0	18	54	23
2-methylcitrate dehydratase PrpD	Q5ZVB1	18	52	28
Urocanate hydratase	Q5ZVR1	18	45	23
Succinate--CoA ligase [ADP-forming] subunit alpha	Q5ZY38	18	43	37
Ribosomal protein S6 modification protein	Q5ZYJ3	18	24	22
Single-stranded DNA-binding protein	Q5ZYL6	18	13	7
Small HspC2 heat shock protein	Q5ZTH0	18	6	15
Sensory box/GGDEF family protein	Q5ZS77	18	1	23
Protein translocase subunit SecA	Q5ZVH7	17	82	43
Penicillin binding protein 1A	Q5ZX08	17	77	35
DNA polymerase III subunit gamma/tau	Q5ZRX2	17	62	43
Threonine--tRNA ligase	Q5ZS05	17	56	64
Biotin carboxylase	Q5ZYB0	17	53	26
Valine--tRNA ligase	Q5ZXL2	17	53	24
30S ribosomal protein S6	Q5ZV48	17	49	18
Inosine-5'-monophosphate dehydrogenase	Q5ZUR9	17	46	25
Succinate dehydrogenase iron-sulfur protein subunit B	Q5ZY42	17	37	30
Acetylpolyamine aminohydolase	Q5ZTF0	17	23	17
Alanine dehydrogenase and pyridine nucleotide transhydrogenase	Q5ZX56	17	20	17
Kynurenine 3-monooxygenase	Q5ZX41	17	7	18
Acetoacetate decarboxylase ADC	Q5ZXQ9	17	5	17
Protein translocase subunit SecD	Q5ZU07	16	83	32
Alanine dehydrogenase	Q5ZX09	16	77	34
Phenylalanine--tRNA ligase beta subunit	Q5ZS09	16	66	87
Aminopeptidase N	Q5ZRS1	16	62	46
Cell division protein FtsA	Q5ZSA9	16	61	26
RND efflux membrane fusion protein, acriflavin resistance protein E	Q5ZXL0	16	56	32
Glutamine--tRNA ligase	Q5ZVY2	16	49	31
50S ribosomal protein L27	Q5ZS69	16	46	15
DNA repair protein RadA	Q5ZT39	16	40	32
Adenosylhomocysteinase	Q5ZTY7	16	38	26
Transcription termination/antitermination protein NusA	Q5ZRV3	16	33	14
Efflux pump membrane transporter	Q5ZSK5	16	30	11
IcmB (DotO)	Q5ZYB6	16	27	38
Long chain fatty acid-CoA ligase	Q5ZV86	16	17	14
Response regulator GacA	Q5ZS73	16	16	19
SdbC	Q5ZSN5	16	6	15
Lipase	Q5ZUB8	16	6	10
Long chain fatty acid transporter	Q5ZUI8	15	135	39
IcmX	Q5ZS30	15	88	25
Zinc metalloprotein	Q5ZZ24	15	86	22
NADH-quinone oxidoreductase subunit F	Q5ZRU3	15	73	33
Long chain acyl-CoA dehydrogenase	Q5ZYR8	15	54	59
Ribonuclease R	Q5ZZB9	15	49	22
tRNA-2-methylthio-N(6)-dimethylallyladenosine synthase	Q5ZVV6	15	46	20
3-oxoacyl-(Acyl carrier protein) synthase	Q5ZZA9	15	45	39
DNA helicase	Q5ZUF6	15	39	21
Zinc-type alcohol dehydrogenase-like protein	Q5ZTF4	15	38	16
Transcription accessory protein	Q5ZRP6	15	35	36
Methylmalonate-semialdehyde dehydrogenase	Q5ZZ82	15	30	18
Glutamate--tRNA ligase	Q5ZU96	15	28	17
Ribosome-binding ATPase YchF	Q5ZS65	15	22	12
Probable glycine dehydrogenase (decarboxylating) subunit 2	Q5ZZ97	14	69	45
Piperidine-6-carboxylate dehydrogenase	Q5ZVT9	14	66	30
L-lysine dehydrogenase	Q5ZVU0	14	50	30
Uncharacterized protein	Q5ZZC7	14	47	25
Peroxynitrite reductase, AhpC/Tsa family	Q5ZRB7	14	46	29
UDP-N-acetylmuramoyl-tripeptide--D-alanyl-D-alanine ligase	Q5ZSA1	14	42	27
Pyridoxal phosphate-dependent enzyme apparently involved in regulation of cell wall biosynthesis	Q5ZXH6	14	40	12
Pantothenate synthetase	Q5ZS57	14	39	6
Uncharacterized protein	Q5ZX80	14	36	11
Signal peptide peptidase SppA (Protease IV)	Q5ZX77	14	32	15
UvrABC system protein A	Q5ZYI8	14	29	36
Glycine--tRNA ligase beta subunit	Q5ZUF9	14	28	41
Acetoacetyl CoA synthetase	Q5ZUG7	14	24	23
UDP-N-acetylmuramoylalanine--D-glutamate ligase	Q5ZSA3	14	17	9
Microtubule binding protein, putative	Q5ZUC3	14	6	36
Phospholipase/lecithinase/hemolysin, lysophospholipase A, glycerophospholipid-cholesterol acyltransferase	Q5ZRP3	13	156	18
Type IV pilus biogenesis protein PilQ	Q5ZX02	13	99	23
Peptidase, M23/M37 family	Q5ZY72	13	64	28
Chromosome partitioning protein ParB	Q5ZRI9	13	56	18
3-oxoacyl-[acyl-carrier-protein] synthase 2	Q5ZVP3	13	54	19
Serine--tRNA ligase	Q5ZY59	13	46	22
50S ribosomal protein L20	Q5ZS07	13	46	15
Aspartate--tRNA(Asp/Asn) ligase	Q5ZVG2	13	44	33
Periplasmic protein	Q5ZR91	13	44	16
Tryptophan synthase beta chain	Q5ZVY4	13	40	22
N,N'-diacetyllegionaminic acid synthase	Q5ZXH9	13	39	22
Lipoprotein-releasing system ATP-binding protein LolD	Q5ZT78	13	37	13
DUF58 domain-containing protein	Q5ZRM3	13	36	17
50S ribosomal protein L19	Q5ZYH7	13	35	11
Pyruvate dehydrogenase E1 component subunit alpha	Q5ZV82	13	34	30
Pyruvate dehydrogenase E1 beta subunit	Q5ZV81	13	29	23
Dipeptidyl aminopeptidase/acylaminoacyl peptidase	Q5ZTC2	13	24	18
GTPase Era	Q5ZWZ1	13	21	17
Glutathione S-transferase	Q5ZU99	13	17	30
Inosine 5'-monophosphate dehydrogenase	Q5ZRN7	13	17	19
Stringent starvation protein A	Q5ZS17	13	17	15
ATP-dependent DNA helicase Rep	Q5ZRR4	13	16	23
Uncharacterized protein	Q5ZZD0	13	15	14
SdeD	Q5ZSK8	13	11	17
Probable hydrolase	Q5ZS53	13	7	14
Flagellar hook associated protein type 3 FlgL	Q5ZW61	13	1	10
Major outer membrane protein	Q5ZU34	12	120	19
Agglutination protein	Q5ZXA5	12	91	17
Copper efflux ATPase	Q5ZWQ0	12	59	24
Uncharacterized protein	Q5ZRE0	12	59	15
DotC	Q5ZS44	12	58	17
Polyribonucleotide nucleotidyltransferase	Q5ZRV8	12	55	32
Acyl CoA dehydrogenase, short chain specific	Q5ZX64	12	46	22
Chaperone protein DnaJ	Q5ZTY4	12	44	21
50S ribosomal protein L18	Q5ZYM7	12	43	15
Nucleoside-diphosphate sugar epimerases	Q5ZWW8	12	38	14
Dihydrolipoamide acetyltransferase component of pyruvate dehydrogenase complex	Q5ZV80	12	37	45
30S ribosomal protein S21	Q5ZT07	12	37	11
Transcriptional regulator FleQ	Q5ZX79	12	33	19
Uncharacterized protein	Q5ZTV1	12	32	27
GTP cyclohydrolase II riboflavin biosynthesis	Q5ZTC1	12	32	21
Ribose-phosphate pyrophosphokinase	Q5ZY30	12	30	19
Acetyl-coenzyme A synthetase	Q5ZZ84	12	29	15
D-alanyl-D-alanine carboxypeptidase	Q5ZVD1	12	28	25
Cystathionine beta synthase	Q5ZRD1	12	25	11
Enhanced entry protein EnhA	Q5ZS78	12	24	9
Histidine--tRNA ligase	Q5ZV96	12	21	8
Uncharacterized protein	Q5ZYZ2	12	20	14
Phosphocholine hydrolase Lem3	Q5ZXN5	12	10	19
Adenosine monophosphate-protein hydrolase SidD	Q5ZSQ2	12	9	36
Hypothetical, patatin-like phospholipase	Q5ZSV6	12	6	18
3-hydroxybutyrate dehydrogenase	Q5ZT49	12	5	17
IcmK (DotH)	Q5ZYC2	11	81	25
Cytochrome c oxidase subunit 2	Q5ZRI4	11	64	17
Sensory box histidine kinase/response regulator	Q5ZU95	11	54	55
Citrate synthase	Q5ZVB0	11	48	21
DNA mismatch repair protein MutS	Q5ZUJ3	11	44	40
2-oxoisovalerate dehydrogenase, E1 component, alpha and beta fusion	Q5ZSD8	11	44	16
3-ketoacyl CoA thiolase	Q5ZVT7	11	38	30
Acetyl-coenzyme A carboxylase carboxyl transferase subunit beta	Q5ZVU9	11	36	12
50S ribosomal protein L25	Q5ZS67	11	33	16
tRNA uridine 5-carboxymethylaminomethyl modification enzyme MnmG	Q5ZRJ2	11	24	14
sn-glycerol-3-phosphate transport, ATP binding protein	Q5ZUR4	11	23	20
Ribosomal RNA large subunit methyltransferase K/L	Q5ZZI8	11	22	18
Uncharacterized protein	Q5ZZE5	11	21	17
Putative phosphoenolpyruvate synthase regulatory protein	Q5ZVB2	11	20	19
ABC transporter ATP binding protein	Q5ZU02	11	20	11
Lysine--tRNA ligase	Q5ZUL6	11	18	16
Shikimate kinase	Q5ZX01	11	18	15
Acetyoacetyl CoA reductase	Q5ZY15	11	16	22
Uncharacterized protein	Q5ZRW5	11	9	12
Uncharacterized protein	Q5ZTF5	11	7	15
Pyruvate decarboxylase	Q5ZWD0	11	5	48
(Type IV) pilus assembly protein PilB	Q5ZVB8	11	4	20
GGDEF domain protein	Q5ZXI7	11	3	26
DamX-related protein	Q5ZWZ9	10	107	24
Serine metalloprotease	Q5ZTY9	10	101	19
Multidrug resistance protein	Q5ZXL1	10	72	48
Probable membrane protein YdgA-like	Q5ZY32	10	51	36
4-hydroxyphenylpyruvate dioxygenase	Q5ZT84	10	46	22
Proline--tRNA ligase	Q5ZXN7	10	38	23
Electron transferring flavoprotein dehydrogenase	Q5ZW12	10	31	20
Conserved domain protein	Q5ZTW4	10	29	9
50S ribosomal protein L11	Q5ZYQ4	10	26	12
50S ribosomal protein L28	Q5ZY93	10	26	7
Uncharacterized protein	Q5ZRK7	10	25	14
Recombination-associated protein RdgC	Q5ZW99	10	25	13
Peptide chain release factor 3	Q5ZX60	10	24	12
Aminotransferase	Q5ZZE1	10	24	12
DotB	Q5ZS43	10	23	13
Oxidoreductase	Q5ZVR8	10	22	15
TldD protein	Q5ZWY3	10	18	28
DNA-binding response regulator	Q5ZVZ6	10	18	14
dCTP deaminase	Q5ZRC6	10	18	7
GMP synthase [glutamine-hydrolyzing]	Q5ZUS0	10	16	9
Formate dehydrogenase	Q5ZYS8	10	16	8
Probable alpha-L-glutamate ligase	Q5ZYF8	10	15	12
Uncharacterized protein	Q5ZZE8	10	12	17
Uncharacterized protein	Q5ZUH5	10	11	11
RNA polymerase sigma-54 factor	Q5ZY95	10	10	11
Carboxy-terminal protease	Q5ZY73	10	8	9
Uncharacterized protein	Q5ZTK0	9	105	22
Aminopeptidase	Q5ZRR6	9	99	12
Cytochrome c	Q5ZRI3	9	70	11
Glu/Leu/Phe/Val dehydrogenase	Q5ZT86	9	58	23
Type II protein secretion LspD	Q5ZVW8	9	54	14
Soluble lytic murein transglycosylase	Q5ZXR8	9	51	22
Major outer membrane protein	Q5ZRC2	9	49	12
DNA polymerase III subunit alpha	Q5ZWX2	9	44	43
30S ribosomal protein S8	Q5ZYM9	9	40	13
50S ribosomal protein L10	Q5ZYQ2	9	39	27
Membrane-bound lytic murein transglycosylase A	Q5ZSH3	9	35	8
Arginine--tRNA ligase	Q5ZTX7	9	34	20
Chromosomal replication initiator protein DnaA	Q5ZZK8	9	33	31
ABC type dipeptide/oligopeptide/nickel transport, ATPase component	Q5ZXN9	9	32	18
dTDP-glucose 4,6-dehydratase	Q5ZXH3	9	29	8
ABC transporter, ATP-binding component	Q5ZUD6	9	28	17
Arabinose 5-phosphate isomerase	Q5ZX92	9	26	13
ATP synthase gamma chain	Q5ZRA0	9	25	19
Uncharacterized protein	Q5ZUP2	9	24	21
Uncharacterized protein	Q5ZTE2	9	24	5
CTP synthase	Q5ZWA4	9	23	13
Uncharacterized protein	Q5ZWX1	9	21	14
50S ribosomal protein L31	Q5ZXT1	9	21	8
Lytic murein transglycosylase	Q5ZRG4	9	21	6
RimK domain-containing protein	Q5ZUY6	9	20	13
Electron transfer flavoprotein, alpha subunit	Q5ZX10	9	19	11
Metallo-beta-lactamase superfamily protein	Q5ZTA6	9	19	8
Phytanoyl-CoA dioxygenase	Q5ZS25	9	18	15
Phosphatidylethanolamine N-methyltransferase	Q5ZTK3	9	17	8
Outer-membrane lipoprotein LolB	Q5ZY27	9	17	6
Epoxyqueuosine reductase QueH	Q5ZRY1	9	16	9
Phosphate acetyl/butyryltransferase family protein includes: (Dehydratase mit MaoC domain	Q5ZTA1	9	14	28
Transcription termination/antitermination protein NusG	Q5ZYQ5	9	14	7
Interaptin	Q5ZRT5	9	13	31
50S ribosomal protein L9	Q5ZV51	9	13	9
GTPase HflX	Q5ZZK0	9	12	11
DNA binding protein Fis	Q5ZY31	9	12	8
Ornithine cyclodeaminase	Q5ZTG6	9	12	7
Nucleoside diphosphate kinase	Q5ZV92	9	12	6
Holliday junction ATP-dependent DNA helicase RuvA	Q5ZW00	9	10	14
Cold shock protein CspE	Q5ZRQ5	9	9	7
Patatin family protein	Q5ZRS3	9	8	17
Acetyoacetyl CoA reductase	Q5ZY14	9	8	3
Uncharacterized protein	Q5ZWD1	9	5	20
Homospermidine synthase	Q5ZSM2	9	4	10
Endonuclease/exonuclease/phosphatase family protein	Q5ZYA3	9	4	4
Uncharacterized protein	Q5ZZC6	9	3	4
Sensory box histidine kinase/response regulator	Q5ZTI2	9	2	21
Catalase-peroxidase 2	Q5ZZ17	8	138	18
Imidazole glycerol-phosphate synthase	Q5ZXI2	8	65	22
N-acetylmuramoyl-L-alanine amidase	Q5ZS21	8	62	25
50S ribosomal protein L23	Q5ZYP1	8	59	6
Polysaccharide ABC transporter, ATP binding protein	Q5ZXF8	8	56	25
Transmembrane Tfp pilus assembly protein FimV (Twitching motility)	Q5ZVY9	8	53	37
Outer membrane protein assembly factor BamB	Q5ZV98	8	50	7
Cystathionine beta-lyase	Q5ZX43	8	41	18
HlyD family secretion protein	Q5ZXS3	8	38	10
Spore coat polysaccharide biosynthesis protein E (NeuB)	Q5ZXG3	8	32	21
ATP-grasp domain-containing protein	Q5ZZ33	8	32	18
Adenylosuccinate synthetase	Q5ZY86	8	31	12
RNA polymerase sigma factor RpoD	Q5ZT04	8	30	18
30S ribosomal protein S10	Q5ZYP4	8	30	7
Chitinase	Q5ZWG9	8	30	4
Aldehyde dehydrogenase	Q5ZVQ9	8	29	15
Cell division protein ZipA	Q5ZSA0	8	28	27
50S ribosomal protein L13	Q5ZS12	8	27	8
IolC/IolB transferase kinase protein	Q5ZUZ1	8	26	55
Glycosyl hydrolase	Q5ZX48	8	25	7
Methyltranfer_dom domain-containing protein	Q5ZXG2	8	24	9
Sigma 54-dependent response regulator	Q5ZUN1	8	21	18
Myo-inositol-2-dehydrogenase	Q5ZUZ0	8	21	13
Enoyl-[acyl-carrier-protein] reductase [NADH]	Q5ZUE4	8	21	10
3-oxoacyl-(Acyl carrier protein) synthase II, N-terminal	Q5ZYL0	8	20	15
Glutathione synthase/ribosomal protein S6 modification enzyme	Q5ZZC8	8	20	13
UDP-N,N'-diacetylbacillosamine 2-epimerase (hydrolyzing)	Q5ZXH8	8	18	8
NADH-quinone oxidoreductase subunit I	Q5ZRU6	8	17	17
Methoxymalonyl CoA synthase	Q5ZU72	8	16	18
IcmO (DotL)	Q5ZYC6	8	15	32
Nucleotide binding protein FliI	Q5ZUN6	8	15	12
Replicative DNA helicase	Q5ZXJ3	8	15	5
VipA	Q5ZYI2	8	14	48
Poly(A) polymerase I	Q5ZVA2	8	13	8
Uncharacterized protein	Q5ZX37	8	13	8
ABC transporter, ATP binding component	Q5ZYI4	8	12	13
Type IV pilus biogenesis protein PilM	Q5ZX06	8	9	9
10 kDa chaperonin	Q5ZXP4	8	9	8
dTDP-4-dehydrorhamnose 3,5-epimerase	Q5ZXH5	8	9	5
Probable monothiol glutaredoxin GrlA	Q48833	8	9	4
Uncharacterized protein	Q5ZYJ5	8	3	6
Threonylcarbamoyl-AMP synthase	Q5ZRB0	8	3	5
Polysaccharide deacetylase	Q5ZU15	8	2	4
Peptidylprolyl isomerase	Q5ZUE3	7	65	10
TPR repeat protein	Q5ZWM3	7	51	10
Outer membrane protein, OmpA family protein , lpg0657	Q5ZXS4	7	43	13
Glutamyl-tRNA reductase	Q5ZT30	7	31	18
Phosphoglycerate kinase	Q5ZZ74	7	30	10
Uncharacterized protein	Q5ZWQ3	7	29	17
Uncharacterized protein	Q5ZUU5	7	29	6
Acyl CoA carboxylase subunit alpha subunit	Q5ZUG9	7	28	65
Polyphosphate kinase	Q5ZYS2	7	27	29
Carbamoyl-phosphate synthase small chain	Q5ZTY5	7	27	12
3-oxoacyl-[acyl-carrier-protein] synthase 3	Q5ZVP7	7	26	13
Beta sliding clamp	Q5ZZK7	7	25	10
Alcohol dehydrogenase (NADP-dependent, zinc-type)	Q5ZXW9	7	23	15
Transmembrane protein	Q5ZS96	7	23	10
3-oxoacyl-[acyl-carrier-protein] synthase 2	Q5ZYL1	7	23	9
Glycine betaine aldehyde dehydrogenase	Q5ZYX3	7	22	13
Sporulation initiation inhibitor protein Soj	Q5ZRJ0	7	22	11
Phosphate starvation-inducible protein PhoH	Q5ZVJ9	7	22	9
Ribonucleoside-diphosphate reductase subunit beta	Q5ZUL8	7	21	16
Glucose-1-phosphate thymidylyltransferase	Q5ZXH1	7	21	14
Uncharacterized protein	Q5ZT52	7	21	12
Glucose-6-phosphate 1-dehydrogenase	Q5ZYF6	7	19	10
Aspartate-semialdehyde dehydrogenase	Q5ZT63	7	17	19
Aspartate carbamoyltransferase	Q5ZXZ2	7	16	15
Uncharacterized protein	Q5ZSJ1	7	16	11
Uncharacterized protein	Q5ZTK6	7	15	29
DNA helicase, SNF2/RAD54 family domain protein	Q5ZXJ6	7	15	24
UPF0229 protein lpg2811	Q5ZRR9	7	15	18
Phosphoenolpyruvate protein phosphotransferase PtsP	Q5ZRL0	7	15	16
Glutamate--cysteine ligase	Q5ZYJ4	7	14	17
Enhanced entry protein EnhB	Q5ZS79	7	13	6
6-phosphogluconolactonase	Q5ZYF5	7	12	3
Succinyl-diaminopimelate desuccinylase	Q5ZXC3	7	10	16
Uracil phosphoribosyltransferase	Q5ZTB9	7	10	7
Polyphenol oxidase	Q5ZVV8	7	10	7
N-terminal acetyltransferase, GNAT family	Q5ZZA8	7	10	6
Uncharacterized protein	Q5ZTZ0	7	10	2
Flagellar motor switch protein FliG	Q5ZUN4	7	9	28
(Two component) response regulator	Q5ZRY9	7	8	8
Polyhydroxyalkanoic synthase	Q5ZWI8	7	7	15
Peptide chain release factor 1	Q5ZT29	7	7	7
Exodeoxyribonuclease 7 large subunit	Q5ZXA6	7	7	7
Phospho-2-dehydro-3-deoxyheptonate aldolase	Q5ZZE7	7	7	5
Multifunctional CCA protein	Q5ZRX9	7	4	12
Transmembrane protein	Q5ZT48	7	3	10
Uncharacterized protein	Q5ZWC5	7	1	4
Membrane bound lytic murein transglycosylase D	Q5ZVZ4	6	60	11
IcmL-like	Q5ZTH2	6	34	39
Cellulase domain-containing protein	Q5ZU89	6	34	13
Probable hydrolase	Q5ZZK3	6	34	10
Phosphogluconate dehydratase	Q5ZYF4	6	32	13
Enhanced entry protein EnhA	Q5ZXM7	6	30	13
ABC transporter ElsE	Q5ZXS2	6	28	15
Cytochrome c type biogenesis protein CycH	Q5ZX67	6	28	9
Iron-sulfur cluster carrier protein	Q5ZUI5	6	27	18
Ribosomal protein S12 methylthiotransferase RimO	Q5ZXP6	6	27	12
UDP-N-acetylglucosamine--N-acetylmuramyl-(pentapeptide) pyrophosphoryl-undecaprenol N-acetylglucosamine transferase	Q5ZXC4	6	26	20
LphA (DotK)	Q5ZYC5	6	26	6
Stringent starvation protein B	Q5ZS18	6	25	12
DhaL domain-containing protein	Q5ZZ08	6	24	18
Xaa-Pro aminopeptidase	Q5ZZD4	6	22	19
Choline monooxygenase	Q5ZTE4	6	22	16
Methionine--tRNA ligase	Q5ZRJ9	6	21	58
Uncharacterized protein	Q5ZVD5	6	21	9
Hypothetical signal peptide protein	Q5ZXJ4	6	21	4
NADH-quinone oxidoreductase subunit C	Q5ZRU0	6	20	11
30S ribosomal protein S18	Q5ZV49	6	20	9
ATP transporter, ABC binding component, ATP-binding protein	Q5ZXX8	6	20	2
Signal peptide protein, LysM domain protein	Q5ZSC3	6	19	8
Anthranilate synthase	Q5ZUQ9	6	18	29
Cysteine desulfurase IscS	Q5ZUP7	6	18	13
50S ribosomal protein L24	Q5ZYN2	6	18	4
Peptide maturation protein PmbA	Q5ZUM2	6	17	14
DNA repair protein RecN	Q5ZRQ6	6	16	10
2-oxoglutarate ferredoxin oxidoreductase alpha subunit	Q5ZWY7	6	15	10
Uncharacterized protein	Q5ZZC4	6	13	5
Glucose-1-dehydrogenase	Q5ZYL4	6	12	15
DNA-binding protein, putative	Q5ZV95	6	12	8
Uncharacterized protein	Q5ZUW3	6	10	9
Uncharacterized protein	Q5ZVB4	6	10	6
Heat shock hsp20	Q5ZZ19	6	10	6
Translation factor	Q5ZVJ7	6	9	4
DUF853 domain-containing protein	Q5ZYU2	6	8	11
ABC transporter, ATP binding protein	Q5ZZ89	6	8	7
RNA pyrophosphohydrolase	Q5ZRK9	6	8	5
Primosomal protein N'	Q5ZRL5	6	8	3
Translation initiation factor IF-3	Q5ZS06	6	8	2
Transcriptional regulator, LysR family	Q5ZYY8	6	7	10
Glutamate racemase	Q5ZT55	6	7	4
Dipeptidyl aminopeptidase/acylaminoacyl peptidase	Q5ZXQ1	6	6	20
DUF4116 domain-containing protein	Q5ZSV7	6	5	9
UPF0758 protein lpg2489	Q5ZSM8	6	5	4
Transcriptional regulatory protein CpxR	Q5ZVK2	6	5	4
Cytidylate kinase	Q5ZVM0	6	5	2
Transcriptional repressor NrdR	Q5ZXK5	6	5	1
Uncharacterized protein	Q5ZT40	6	4	6
Flagellar M-ring protein	Q5ZUN3	6	4	3
Transmembrane protein	Q5ZUN8	5	105	50
Elongation factor Ts	Q5ZUS9	5	43	10
NADH-dependent flavin oxidoreductase, Oye family	Q5ZRZ8	5	42	18
Lipoprotein NlpD	Q5ZW05	5	41	15
2-oxoacid_dh domain-containing protein	Q5ZZA1	5	34	41
SPOR domain-containing protein	Q5ZVW0	5	31	7
30S ribosomal protein S16	Q5ZYH3	5	28	7
Lipopolysaccharide assembly protein B	Q5ZVL7	5	25	26
Thaumatin domain-containing protein	Q5ZVW1	5	25	6
(Beta)-carbonic anhydrase	Q5ZTG8	5	24	9
Multidrug resistance protein	Q5ZZJ5	5	24	7
Heptosyl transferase, glycosyltransferase family 9 protein	Q5ZS24	5	23	15
Aspartyl/glutamyl-tRNA(Asn/Gln) amidotransferase subunit B	Q5ZUQ6	5	23	14
Holliday junction ATP-dependent DNA helicase RuvB	Q5ZV64	5	23	8
Uncharacterized protein	Q5ZVK9	5	23	5
Phosphoribosylformylglycinamidine synthase subunit PurL	Q5ZUW4	5	22	58
Uridylate kinase	Q5ZUT0	5	22	8
Phospho-2-dehydro-3-deoxyheptonate aldolase	Q5ZTY1	5	21	20
Bacterial extracellular solute-binding protein	Q5ZWX5	5	21	11
2-amino-3-ketobutyrate coenzyme A ligase	Q5ZXN0	5	21	8
Signal recognition particle receptor FtsY	Q5ZS49	5	21	6
Dehydrogenase, short chain (Dhs-6C)	Q5ZVQ8	5	20	20
N-succinylglutamate 5-semialdehyde dehydrogenase	Q5ZUT5	5	20	9
Enolase	Q5ZTX1	5	19	17
Uncharacterized protein	Q5ZSU2	5	19	8
FAD monooxygenase, PheA/TfdB family	Q5ZZ35	5	18	21
Glutathione synthetase	Q5ZUF2	5	18	7
Putative agmatine deiminase	Q5ZZK4	5	18	7
Cell division protein ZapD	Q5ZVH4	5	18	6
Imidazole glycerol phosphate synthase subunit HisH 1	Q5ZXI1	5	18	3
Uncharacterized protein	Q5ZXG1	5	17	18
CapM protein, capsular polysaccharide biosynthesis	Q5ZRI2	5	17	15
Deoxyguanosinetriphosphate triphosphohydrolase-like protein	Q5ZUC7	5	15	10
tRNA pseudouridine synthase A	Q5ZVY6	5	15	6
Uncharacterized protein	Q5ZXW8	5	15	5
Spermidine/putrescine import ATP-binding protein PotA	Q5ZWE4	5	14	9
ATP-dependent DNA helicase RecG	Q5ZTX5	5	14	5
Glutamine synthetase	Q5ZTB0	5	13	10
Phenazine biosynthesis PhzF	Q5ZVA9	5	13	10
L-aspartate oxidase	Q5ZXD2	5	12	17
Uncharacterized protein	Q5ZTC0	5	12	10
Inositol-1-monophosphatase	Q5ZUP5	5	12	10
2-oxoglutarate ferredoxin oxidoreductase beta subunit	Q5ZWY6	5	12	9
Competence damage inducible protein CinA	Q5ZS71	5	12	8
Thiopurine S-methyltransferase	Q5ZRP5	5	11	5
SdbC	Q5ZSX5	5	10	9
Dienelactone hydrolase family protein	Q5ZS54	5	10	7
IcmW	Q5ZS31	5	9	9
Glutamate-1-semialdehyde 2,1-aminomutase	Q5ZVA6	5	9	6
Oligoketide cyclase/lipid transporter protein	Q5ZYK2	5	9	5
Aldo/keto reductases	Q5ZY55	5	8	12
Putative mevalonate kinase	Q5ZTW9	5	7	7
Uncharacterized protein	Q5ZX07	5	7	6
Oxidoreductase, short chain dehydrogenase/reductase family	Q5ZUW0	5	6	14
Amidophosphoribosyltransferase	Q5ZUW8	5	6	6
Uncharacterized protein	Q5ZUP1	5	6	3
Uncharacterized protein	Q5ZT98	5	5	3
Dienelactone hydrolase family protein	Q5ZS34	5	4	3
Leucine-rich repeat-and coiled coil-containing protein	Q5ZUB7	5	4	3
Transporting ATPase	Q5ZUA1	5	3	5
Lipoprotein	Q5ZR88	4	85	15
Phosphatidylcholine hydrolyzing phospholipase	Q5ZY70	4	66	12
Outer membrane protein assembly factor BamA	Q5ZY66	4	64	28
Ribonuclease, T2 family	Q5ZRN2	4	57	10
Pyoverdine biosynthesis protein PvcA	Q5ZZ37	4	53	25
Uncharacterized protein	Q5ZWX8	4	44	10
Arginine decarboxylase	A0A572	4	43	39
Uncharacterized protein	Q5ZRM7	4	39	18
Phosphoribosylformylglycinamidine synthase subunit PurQ	Q5ZUW6	4	38	19
Catalase-peroxidase 1	Q5ZSX7	4	32	16
Hypothetical transporter	Q5ZX55	4	32	5
Zinc protease (Peptidase, M16 family)	Q5ZS48	4	30	12
Peptidoglycan D,D-transpeptidase FtsI	Q5ZX17	4	30	10
Lipoprotein	Q5ZVC6	4	28	9
Pyrophosphate--fructose 6-phosphate 1-phosphotransferase	Q5ZU94	4	27	19
Amine oxidase, flavin containing	Q5ZZ28	4	26	15
DNA topoisomerase 4 subunit B	Q5ZXP0	4	26	13
Uncharacterized protein	Q5ZXG0	4	25	18
Outer membrane protein MIP	Q5ZXE0	4	25	8
Proline iminopeptidase	Q5ZUF5	4	23	8
Uncharacterized protein	Q5ZYJ8	4	23	4
FolC bifunctional protein	Q5ZVU8	4	20	7
ATPase associated with chromosome architecture	Q5ZUM9	4	19	21
Riboflavin biosynthesis protein RibD	Q5ZWA8	4	19	9
NADH-quinone oxidoreductase subunit B	Q5ZRT9	4	18	11
Phenylalanine--tRNA ligase alpha subunit	Q5ZS08	4	17	18
S-adenosylmethionine:tRNA ribosyltransferase-isomerase	Q5ZU04	4	17	8
Single stranded DNA specific exonuclease RecJ	Q5ZVH9	4	16	22
Adenosine deaminase	Q5ZY00	4	16	15
Oligopeptidase A	Q5ZZ70	4	16	15
Phosphomannose isomerase GDP mannose pyrophosphorylase	Q5ZRJ4	4	16	4
Enoyl CoA hydratase/isomerase (Crotonase)	Q5ZUH0	4	15	7
dTDP-4-dehydrorhamnose reductase	Q5ZXH4	4	14	12
Carboxypeptidase G2	Q5ZUT7	4	14	10
Lipopolysaccharide biosynthesis glycosyltransferase	Q5ZXB1	4	14	8
Aminopeptidase N	Q5ZVE3	4	13	35
Flagellar P-ring protein	Q5ZW64	4	13	8
UDP-N-acetylmuramate--L-alanyl-gamma-D-glutamyl-meso-2,6-diaminoheptandioate ligase	Q5ZUP0	4	12	8
Sec translocon accessory complex subunit YajC	Q5ZU06	4	12	7
Phosphopantetheine adenylyltransferase	Q5ZY26	4	12	2
Pyoverdine biosynthesis protein PvcB	Q5ZZ36	4	11	16
Probable septum site-determining protein MinC	Q5ZV87	4	11	3
Inclusion membrane protein A	Q5ZT67	4	10	19
Fructose bisphosphate aldolase	Q5ZYA2	4	10	14
16 kD immunogenic protein	Q5ZUS7	4	10	7
Methylated DNA protein cysteine S-methyltransferase	Q5ZYH8	4	10	6
Uncharacterized protein	Q5ZSV5	4	9	13
Acetyl-CoA carboxylase, biotin carboxylase subunit	Q5ZS55	4	9	11
RNA polymerase sigma factor RpoS	Q5ZW04	4	9	9
tRNA-specific 2-thiouridylase MnmA	Q5ZVQ1	4	9	6
Heme chaperone HemW	Q5ZT11	4	9	5
Short chain dehydrogenase	Q5ZYW8	4	8	8
3-hydroxyacyl CoA dehydrogenase	Q5ZU66	4	8	7
Uncharacterized protein	Q5ZWK1	4	8	5
Cellobiose phosphorylase	Q5ZSN7	4	8	3
Hypothetical phosphate transport regulator	Q5ZXZ6	4	7	15
4-aminobutyrate aminotransferase	Q5ZYX2	4	7	7
Transmembrane protein	Q5ZZJ6	4	7	6
Transcription elongation factor GreA	Q5ZS95	4	7	4
Dihydrofolate reductase	Q5ZYR2	4	6	7
Recombination protein RecR	Q5ZRX0	4	6	5
GTPase Obg	Q5ZS70	4	6	4
Pseudouridine synthase	Q5ZT70	4	6	2
Orotidine 5'-phosphate decarboxylase	Q5ZVL5	4	6	2
Hydrogenase expression/formation protein HypB	Q5ZSP2	4	5	6
Formamidopyrimidine-DNA glycosylase	Q5ZY18	4	5	4
Uncharacterized protein	Q5ZTB4	4	4	13
Uncharacterized protein	Q5ZRC9	4	4	8
Uncharacterized protein	Q5ZRR2	4	4	8
PIN_12 domain-containing protein	Q5ZZ60	4	3	11
D,D-heptose 1,7-bisphosphate phosphatase	Q5ZUG0	4	3	1
Rhodanese domain protein	Q5ZUM4	4	2	2
Anthranilate phosphoribosyltransferase	Q5ZX98	4	2	2
Hypothetical phage repressor	Q5ZTV2	4	1
Flagellar secretion chaperone FliS	Q5ZVV3	4	1	2
Sodium-type flagellar protein	Q5ZRC0	4	1	1
Peptidase, M23/M37 family	Q5ZY08	3	112	15
Tyrosine phosphatase II superfamily protein	Q5ZRR1	3	93	2
SPOR domain-containing protein	Q5ZVU7	3	87	10
PHA synthase	Q5ZTA2	3	54	25
UPF0422 protein lpg2959	Q5ZRC3	3	45	5
LigA, interaptin	Q5ZXN8	3	42	29
Uncharacterized protein	Q5ZZ81	3	37	34
Membrane protein insertase YidC	Q5ZR81	3	35	21
Cell division protein FtsQ	Q5ZSA8	3	34	6
Hypothetical, SCO1/SenC family protein	Q5ZYF9	3	33	7
Outer membrane protein TolC	Q5ZXN2	3	32	4
Thiol:disulfide interchange protein	Q5ZZ88	3	29	6
Lipoprotein ABC transporter	Q5ZT77	3	27	13
DotD	Q5ZS45	3	27	6
Electron transfer flavoprotein, beta subunit	Q5ZX11	3	27	6
Uncharacterized protein	Q5ZY54	3	27	3
Uncharacterized protein	Q5ZRK2	3	25	17
Malonyl CoA-acyl carrier protein transacylase	Q5ZVP6	3	25	6
Alkylhydroperoxide reductase, AhpC/TSA family	Q5ZT15	3	24	14
ATP-dependent protease ATPase subunit HslU	Q5ZXU0	3	23	12
Acyl CoA dehydrogenase	Q5ZUH4	3	23	6
Uncharacterized protein	Q5ZT45	3	22	4
Phasin_2 domain-containing protein	Q5ZY12	3	19	3
Transketolase	Q5ZZ72	3	18	11
3-oxoacyl-(Acyl carrier protein) reductase	Q5ZX28	3	18	6
Lipoprotein	Q5ZYS1	3	18	5
Uncharacterized protein	Q5ZXK9	3	18	1
ATP synthase F1, beta chain	Q5ZWN1	3	17	20
Nucleotidyltransferase PLUS glutamate rich protein GrpB PLUS ribosomal protein alanine acetyltransferase	Q5ZWJ7	3	17	18
DNA polymerase I	Q5ZZB2	3	16	54
Cysteine--tRNA ligase	Q5ZVY1	3	16	6
3-hydroxyisobutyryl Coenzyme A hydrolase	Q5ZX63	3	16	4
Uncharacterized protein	Q5ZS82	3	15	14
Leucine aminopeptidase	Q5ZS85	3	15	11
3-methyl-2-oxobutanoate hydroxymethyltransferase	Q5ZS58	3	15	7
Succinate semialdehyde dehydrogenase	Q5ZTB1	3	15	7
Transcriptional regulatory protein	Q5ZVN0	3	15	7
OMP_b-brl domain-containing protein	Q5ZZB0	3	15	7
Flagellar GTP-binding protein FlhF	Q5ZUK9	3	14	17
Sid related protein-like	Q5ZTK7	3	14	14
Bifunctional uridylyltransferase/uridylyl-removing enzyme	Q5ZUS2	3	14	12
Oxidoreductase, short chain dehydrogenase/reductase family	Q5ZYS5	3	14	8
50S ribosomal protein L34	Q5ZR78	3	14	3
Conserved domain protein	Q5ZZC0	3	14	2
Multifunctional fusion protein	Q5ZS19	3	13	24
Hypothetical virulence protein	Q5ZY48	3	13	14
Glutathione reductase	Q5ZY02	3	13	2
ABC transporter, ATP binding protein	Q5ZRF9	3	13	1
RNA polymerase-associated protein RapA	Q5ZT66	3	12	25
Metal ion transporter	Q5ZXX0	3	12	17
NAD(P) transhydrogenase subunit beta	Q5ZX58	3	12	15
2-acylglycerophosphoethanolamine acyltransferase	Q5ZXY3	3	12	9
2-polyprenyl-6-methoxyphenol hydroxylase	Q5ZZD2	3	12	8
Histidine ammonia-lyase	Q5ZVR0	3	12	6
Nicotinate-nucleotide pyrophosphorylase	Q5ZXC5	3	12	3
Uncharacterized protein	Q5ZZ22	3	11
Glycerol-3-phosphate acyltransferase	Q5ZT09	3	11	17
Flavin containing monooxygenae	Q5ZXA1	3	11	13
Glycerol-3-phosphate dehydrogenase	Q5ZVM7	3	11	10
L-serine dehydratase (Iron, sulfur-dependent)	Q5ZXE1	3	11	6
3-hydroxymyristoyl/3-hydroxydecanoyl-(Acyl carrier protein) dehydratases	Q5ZYL2	3	11	6
Glutamate-cysteine ligase	Q5ZUF1	3	11	4
Phosphoribosylformylglycinamidine cyclo-ligase	Q5ZUW5	3	11	4
UDP-N-acetylmuramoyl-L-alanyl-D-glutamate--2,6-diaminopimelate ligase	Q5ZX16	3	11	4
Peptidyl-prolyl cis-trans isomerase	Q5ZRZ4	3	11	1
Glycine--tRNA ligase alpha subunit	Q5ZUF8	3	10	8
Diaminopimelate epimerase	Q5ZYK6	3	10	8
Exodeoxyribonuclease III	Q5ZXT3	3	10	7
DNA ligase	Q5ZWX6	3	10	3
Peptide deformylase	Q5ZSC4	3	10	2
Purine/pyrimidine phosphoribosyltransferase	Q5ZVC1	3	10	2
Two component histidine kinase, GGDEF domain protein/EAL domain protein	Q5ZXA3	3	9	26
3-dehydroquinate synthase	Q5ZX00	3	9	18
TPR domain protein	Q5ZSN2	3	9	14
Choline kinase	Q5ZVN2	3	9	6
O-methyltransferase, SAM-dependent	Q5ZT85	3	9	5
Phenol hydroxylase	Q5ZYA1	3	9	4
ABC transporter, ATP binding protein	Q5ZX96	3	9	1
50S ribosomal protein L33	Q5ZY94	3	9	1
Octanoyltransferase	Q5ZVC9	3	8	6
Uncharacterized protein	Q5ZXK0	3	8	3
YdeN-like	Q5ZZE3	3	8	3
Ribosomal RNA large subunit methyltransferase J	Q5ZVZ2	3	8	2
7-cyano-7-deazaguanine synthase	Q5ZRJ5	3	8	1
Pyoverdine biosynthesis regulatory gene SyrP-like	Q5ZU71	3	7	10
Small ribosomal subunit biogenesis GTPase RsgA	Q5ZRX8	3	7	8
GTP cyclohydrolase 1	Q5ZRW0	3	7	3
Universal stress protein	Q5ZWZ8	3	7	3
YkuD domain-containing protein	Q5ZV58	3	7	2
Probable protein kinase UbiB	Q5ZRH7	3	6	25
Dihydroorotase	Q5ZRB9	3	6	5
5-formyltetrahydrofolate cyclo-ligase	Q5ZXY7	3	6	1
Sensor protein LuxN	Q5ZRY7	3	5	9
Phosphoribosylaminoimidazole-succinocarboxamide synthase	Q5ZUW7	3	5	7
Peroxiredoxin, AhpC/TSA family protein	Q5ZRP0	3	5	4
Iron-sulfur cluster insertion protein ErpA	Q5ZVQ2	3	5	3
Elongation factor P	Q5ZYS4	3	5	3
DUF2063 domain-containing protein	Q5ZTA9	3	5	2
Glutamate 5-kinase	Q5ZV32	3	4	6
DnaA-like family protein	Q5ZRS8	3	4	3
NUDIX hydrolase	Q5ZT12	3	4	3
Probable transcriptional regulatory protein lpg1286	Q5ZW02	3	4	3
Pyridine nucleotide-disulfide oxidoreductase	Q5ZYW7	3	2	7
Hydrolase_4 domain-containing protein	Q5ZRN5	3	2	6
Acyltransferase	Q5ZT97	3	2	4
Uncharacterized protein	Q5ZSE9	3	2	3
ATP-dependent protease subunit HslV	Q5ZXU1	3	2	2
Competence related protein ComM	Q5ZXZ0	3	2	2
Uncharacterized protein	Q5ZSI8	3	1	25
Sensory box protein/GGDEF domain/EAL domain	Q5ZVC2	3	1	18
Sensory box histidine kinase	Q5ZSQ9	3	1	8
Hypothetical with two candidate membrane-spanning segments	Q5ZS37	3	1	7
Thioesterase domain-containing protein	Q5ZXA2	2	51	14
Chromosome partition protein Smc	Q5ZS99	2	49	31
Endolytic peptidoglycan transglycosylase RlpA	Q5ZVD2	2	45	13
Tol-Pal system protein TolB	Q5ZV69	2	35	8
Multicopper oxidase	Q5ZYU6	2	32	8
Adenosine deaminase	Q5ZY75	2	29	27
Periplasmic protein	Q5ZUJ1	2	28	13
Cell shape-determining protein MreC	Q5ZXC0	2	28	3
Malate oxidoreductase	Q5ZW08	2	27	8
2-octaprenyl-6-methoxyphenol hydroxylase	Q5ZZD3	2	26	20
Uncharacterized protein	Q5ZWX7	2	26	4
Myo-inositol catabolism protein IolD	Q5ZUZ2	2	25	14
MoxR protein (ATPase) methanol dehydrogenase regulatory protein	Q5ZRM2	2	25	10
UDP-3-O-(3-hydroxymyristoyl) glucosamine N-acyltransferase	Q5ZY64	2	23	13
Uncharacterized protein	Q5ZS97	2	23	8
Uncharacterized protein	Q5ZUR5	2	22	14
Carbonic anhydrase Mig5	Q5ZSL7	2	22	4
NAD dependent epimerase/dehydratase, UDP-glucose-4-epimerase	Q5ZXH0	2	21	9
Metallopeptidase PepO, peptidase, M13 family	Q5ZSB2	2	21	8
23S rRNA (uracil(1939)-C(5))-methyltransferase RlmD	Q5ZVI4	2	21	8
(Outer) membrane protein	Q5ZXM4	2	21	3
SPOR domain-containing protein	Q5ZTX8	2	21	2
4-hydroxy-tetrahydrodipicolinate reductase	Q5ZZ80	2	19	7
Riboflavin biosynthesis protein RibBA	Q5ZWA6	2	19	3
Periplasmic serine endoprotease DegP-like	Q5ZVV9	2	18	3
ATP-dependent Clp protease proteolytic subunit	Q5ZUD9	2	17	5
Uncharacterized protein	Q5ZXE3	2	16	6
Uncharacterized protein	Q5ZW97	2	16	2
Indole-3-glycerol phosphate synthase	Q5ZX99	2	16	1
Transmembrane protein	Q5ZV97	2	15	6
Uncharacterized protein	Q5ZWR9	2	15	6
Uncharacterized protein	Q5ZUI4	2	15	3
Choloylglycine hydrolase	Q5ZXC8	2	15	3
Acid phosphatase, class B	Q5ZS98	2	15	2
N-succinylarginine dihydrolase	Q5ZUT4	2	14	8
Glucose-6-phosphate isomerase	Q5ZXH2	2	14	5
Type I secretion system LssZ	Q5ZVC7	2	13	6
Arginine ABC transporter, periplasmic binding protein	Q5ZXQ3	2	13	3
Outer membrane efflux protein	Q5ZZJ2	2	13	2
Multidrug efflux MFS outer membrane protein (RND family)	Q5ZXR9	2	13	1
ABC transporter ATP binding protein	Q5ZW11	2	12	15
Trigger factor	Q5ZUD8	2	12	8
[Ribosomal protein S18]-alanine N-acetyltransferase	Q5ZVD9	2	12	5
2,3,4,5-tetrahydropyridine-2,6-dicarboxylate N-succinyltransferase	Q5ZX45	2	12	3
ATP synthase subunit b	Q5ZR97	2	11	13
Signal peptide protein, toluene tolerance protein Ttg2D	Q5ZX88	2	11	3
Probable glycine dehydrogenase (decarboxylating) subunit 1	Q5ZZ95	2	11	3
Methionine import ATP-binding protein MetN	Q5ZUG5	2	10	12
Uncharacterized protein	Q5ZXD4	2	10	2
DNA polymerase III subunit epsilon	Q5ZVQ6	2	9	9
CMP-N,N'-diacetyllegionaminic acid synthase	Q5ZXI0	2	9	4
RND efflux membrane fusion protein	Q5ZYY6	2	9	3
tRNA modification GTPase MnmE	Q5ZR82	2	8	11
Mg2+ and Co2+ transporter CorB, hemolysin	Q5ZRW3	2	8	9
UvrABC system protein C	Q5ZS74	2	8	7
Tyrosine--tRNA ligase	Q5ZY07	2	8	7
HIT family hydrolase	Q5ZRW1	2	8	5
Curved DNA binding protein DnaJ	Q5ZT99	2	8	4
Methyltranfer_dom domain-containing protein	Q5ZS41	2	8	2
Glutamine amidotransferase, class I	Q5ZTB3	2	7	12
Alpha/beta hydrolase	Q5ZV18	2	7	11
ABC transporter, ATP binding protein	Q5ZTW2	2	7	6
Pseudouridine synthase	Q5ZVJ3	2	7	5
Phosphopentomutase	Q5ZXU2	2	7	4
Uncharacterized protein	Q5ZUB5	2	7	1
Uncharacterized protein	Q5ZX50	2	6
Saframycin Mx1 synthetase B	Q5ZTD3	2	6	7
Toluene tolerance ABC transporter, ATP binding protein Ttg2A	Q5ZX91	2	6	7
Triosephosphate isomerase	Q5ZRT6	2	6	5
Thymidine kinase	Q5ZXU5	2	6	3
D-alanyl-D-alanine dipeptidase	Q5ZSD4	2	6	2
Fis transcriptional activator	Q5ZUQ0	2	6	1
Cadmium efflux ATPase	Q5ZWS5	2	5	13
RecB family exonuclease, hypothetical	Q5ZT93	2	5	12
Tetraacyldisaccharide 4'-kinase	Q5ZUI0	2	5	8
Fumarate hydratase class II	Q5ZRE5	2	5	6
Flagellar motor switch protein FliM	Q5ZUK6	2	5	5
Thioredoxin reductase	Q5ZUM6	2	5	5
Bacteriophage related DNA polymerase	Q5ZYU9	2	5	5
ATP synthase subunit delta	Q5ZR98	2	5	3
Ribosomal RNA small subunit methyltransferase A	Q5ZRF4	2	5	3
Ribosome maturation factor RimP	Q5ZRV2	2	5	3
Uncharacterized protein	Q5ZW78	2	5	2
50S ribosomal protein L7/L12	Q5ZYQ1	2	5	2
tRNA dimethylallyltransferase	Q5ZS23	2	5	1
Histidine biosynthesis bifunctional protein HisIE	Q5ZW93	2	5	1
Hypothetical phosphotransferase	Q5ZYR5	2	5	1
2-deoxy-D-gluconate-3-dehydrogenase	Q5ZZ07	2	5	1
Nucleoside triphosphate pyrophosphatase	Q5ZTX2	2	4
D-aminoacyl-tRNA deacylase	Q5ZUF4	2	4
Dipeptide epimerase	Q5ZU52	2	4	14
UPF0176 protein lpg2838	Q5ZRP2	2	4	7
ATP dependent DNA helicase (DEAD box family) Rad3	Q5ZU85	2	4	6
Uncharacterized protein	Q5ZZ98	2	4	6
Site-determining protein	Q5ZUL0	2	4	5
Glycine cleavage T protein	Q5ZV61	2	4	4
Sigma-54 modulation protein	Q5ZY96	2	4	4
Ferredoxin 2Fe-2S protein	Q5ZS11	2	4	3
Uncharacterized protein	Q5ZVC0	2	4	3
Neurogenic locus notch protein homolog	Q5ZXA9	2	4	2
Ribosomal RNA small subunit methyltransferase H	Q5ZX19	2	4	1
SsrA-binding protein	Q5ZRP1	2	3
Succinate semialdehyde dehyrogenase (NADP+)	Q5ZV57	2	3	12
2,3-bisphosphoglycerate-independent phosphoglycerate mutase	Q5ZY71	2	3	7
Ankyrin repeat-containing protein	Q5ZZH2	2	3	7
Hydrogenase maturation factor	Q5ZSP5	2	3	5
Malonate decarboxylase acyl carrier protein	Q5ZST9	2	3	5
Glycerol kinase	Q5ZVM6	2	3	4
Oxidoreductase, short chain dehydrogenase/reductase family	Q5ZUK3	2	3	3
Methionyl-tRNA formyltransferase	Q5ZSC5	2	3	2
Anhydro-N-acetylmuramic acid kinase	Q5ZVN7	2	3	2
UvrABC system protein B	Q5ZZD9	2	3	2
TolA colicin import membrane protein	Q5ZV68	2	3	1
FMN-dependent NADH-azoreductase	Q5ZT75	2	2
Probable potassium transport system protein kup 1	Q5ZW98	2	2	12
Uncharacterized protein	Q5ZRD0	2	2	11
ATP synthase subunit b	Q5ZWN6	2	2	6
Glutathione S-transferase	Q5ZSS6	2	2	5
IcmS	Q5ZYD0	2	2	4
tRNA pseudouridine synthase D	Q5ZV19	2	2	3
Eukaryotic small stress protein PASS1	Q5ZUM0	2	2	2
Methyltransferase	Q5ZWJ6	2	2	2
Uncharacterized protein	Q5ZU36	2	2	1
Uncharacterized protein	Q5ZVQ0	2	2	1
DNA binding stress protein	Q5ZXP2	2	2	1
Site-specific DNA-methyltransferase (adenine-specific)	Q5ZXS7	2	2	1
Arsenate reductase	Q5ZYW3	2	2	1
Acetyltransferase	Q5ZZG2	2	2	1
Uncharacterized protein	Q5ZZ06	2	1
Response regulator TutC	Q5ZTL5	2	1	16
IcmV	Q5ZS32	2	1	11
tRNA N6-adenosine threonylcarbamoyltransferase	Q5ZT08	2	1	7
Chorismate lyase	Q5ZVL1	2	1	4
Cytokinin riboside 5'-monophosphate phosphoribohydrolase	Q5ZSL8	2	1	3
Lipid A export ATP-binding/permease protein MsbA	Q5ZUH9	2	1	1
50S ribosomal protein L30	Q5ZYM5	2	1	1
Putative regulator, MerR family transcription regulators	Q5ZZF3	2	1	1
Uncharacterized protein	Q5ZUX7	1	54	12
Uncharacterized protein	Q5ZX33	1	51	11
Outer membrane efflux protein (RND multidrug efflux)	Q5ZSK3	1	42	6
Peptidoglycan D,D-transpeptidase MrdA	Q5ZVR5	1	36	10
ATP-dependent RNA helicase DeaD	Q5ZT20	1	34	11
Lysophospholipase A	Q5ZT22	1	32	1
Leucine-, isoleucine-, valine-, threonine-, and alanine-binding protein	Q5ZY74	1	31	5
Aminotransferase	Q5ZVL6	1	28	13
Probable sphingosine-1-phosphate lyase	Q5ZTI6	1	27	12
Uncharacterized protein	Q5ZXB7	1	26	3
Quinolinate synthase	Q5ZXD3	1	20	16
Outer membrane protein assembly factor BamD	Q5ZWA0	1	20	7
Uncharacterized protein	Q5ZYR1	1	20	2
Glucoamylase	Q5ZYF0	1	19
Uncharacterized protein	Q5ZWH9	1	19	2
Stress-induced protein	Q5ZTZ7	1	18	6
Lipoyl synthase	Q5ZXI6	1	18	6
Uncharacterized protein	Q5ZTK1	1	18	5
30S ribosomal protein S15	Q5ZRV7	1	18	3
Phospholipase C	Q5ZVI5	1	17
Protein-L-isoaspartate-O-methyltransferase	Q5ZXN1	1	17	4
Uncharacterized protein	Q5ZVF1	1	17	1
Bifunctional protein GlmU	Q5ZRK6	1	16	15
UDP-3-O-acyl-N-acetylglucosamine deacetylase	Q5ZSB1	1	16	5
Two component sensor kinase	Q5ZVZ7	1	15	21
Cytochrome D ubiquinol oxidase, subunit I	Q5ZW85	1	14	18
Pyruvate kinase	Q5ZZ75	1	14	8
3-hydroxy-3-methylglutaryl coenzyme A reductase	Q5ZTV6	1	14	7
F-box domain-containing protein	Q5ZSJ2	1	14	6
3'-nucleotidase/nuclease	Q5ZV70	1	14	6
tRNA-cytidine(32) 2-sulfurtransferase	Q5ZXN3	1	14	4
Uncharacterized protein	Q5ZUI1	1	14	2
Putative secreted protein	Q5ZV15	1	14	2
Ferrochelatase	Q5ZYE7	1	13	15
Dual-specificity RNA methyltransferase RlmN	Q5ZV93	1	13	2
Glycosyltransferase, group 2 family protein (Glycan biosynthesis)	Q5ZSN9	1	12	14
Uncharacterized protein	Q5ZXI9	1	12	10
Multidrug resistance secretion protein	Q5ZYV4	1	12	5
30S ribosomal protein S20	Q5ZS83	1	12	3
Autotransporter domain-containing protein	Q5ZUQ5	1	12	3
Uncharacterized protein	Q5ZVH2	1	12	3
Outer membrane protein OmpH	Q5ZY65	1	12	2
ABC transporter, permease	Q5ZXX9	1	11	12
Coenzyme A biosynthesis bifunctional protein CoaBC	Q5ZSM9	1	11	5
Glycosyltransferase	Q5ZXF2	1	11	5
Pyridoxine 5'-phosphate synthase	Q3V870	1	10	7
ABC transporter, permease component	Q5ZXX7	1	10	6
Cytosolic IMP-GMP specific 5'-nucleotidase	Q5ZZB6	1	10	6
NG,NG-dimethylarginine dimethylaminohydrolase	Q5ZUY5	1	10	4
Uncharacterized protein	Q5ZV39	1	10	4
Oxidoreductase	Q5ZVW7	1	10	4
IcmL (DotI)	Q5ZYC3	1	10	4
Protoheme IX synthesis HemY	Q5ZRY3	1	9	20
Phosphate acyltransferase	Q5ZVP8	1	9	19
Acyl-[acyl-carrier-protein]--UDP-N-acetylglucosamine O-acyltransferase	Q5ZY61	1	9	12
ATP synthase epsilon chain	Q5ZRA2	1	9	5
Acetyltransferase	Q5ZW77	1	9	4
Acetylornithine deacetylase	Q5ZWC1	1	9	3
Uncharacterized protein	Q5ZZ20	1	9	3
Signal peptide peptidase	Q5ZUP4	1	9	2
Uncharacterized protein	Q5ZXG5	1	9	2
3-deoxy-manno-octulosonate cytidylyltransferase	Q5ZU88	1	9	1
(Serine-type) D-alanyl-D-alanine carboxypeptidase	Q5ZRG3	1	8
Hydrogen peroxide-inducible genes activator OxyR	Q5ZUI3	1	8	13
Uncharacterized protein	Q5ZXP1	1	8	8
Uncharacterized protein	Q5ZW15	1	8	5
Inorganic pyrophosphatase	Q5ZRW2	1	8	3
Hydroxymethylglutaryl-CoA lyase	Q5ZUG8	1	8	3
Sulfatase domain protein	Q5ZVY0	1	8	3
Methionine aminopeptidase	Q5ZUS3	1	8	2
Acyl carrier protein	Q5ZVP4	1	8	2
Uncharacterized protein	Q5ZXV7	1	7
ATP-dependent DNA helicase (UvrD/Rep helicase)	Q5ZUI6	1	7	22
Potassium efflux system KefA	Q5ZVG1	1	7	18
Nucleoside-diphosphate sugar epimerase	Q5ZTE8	1	7	17
Tol-Pal system protein TolQ	Q5ZV66	1	7	16
Oxidoreductase, FAD-binding	Q5ZWP1	1	7	16
Uncharacterized protein	Q5ZXR4	1	7	10
Glycosyl transferase	Q5ZXF3	1	7	9
Uncharacterized protein	Q5ZYG2	1	7	5
Deoxyribonuclease TatD	Q5ZVN8	1	7	3
Lipid-A-disaccharide synthase 1	Q5ZVR9	1	7	3
UPF0434 protein lpg1920	Q5ZU87	1	7	2
33 kDa chaperonin	Q5ZRR3	1	7	1
ABC sugar transporter, periplasmic sugar binding protein	Q5ZZ27	1	7	1
Oxaloacetate decarboxylase alpha subunit	Q5ZYA6	1	6	9
Hydrogenase expression/formation protein HypE	Q5ZSP6	1	6	5
Type IV pilus biogenesis protein PilO	Q5ZX04	1	6	5
Phosphoribosylamine--glycine ligase	Q5ZUW9	1	6	4
Probable GTP-binding protein EngB	Q5ZZ86	1	6	3
Uncharacterized protein	Q5ZSE7	1	6	2
Quinone oxidoreductase	Q5ZUR1	1	6	2
Lipase A	Q5ZVI8	1	6	2
Thiol:disulfide interchange protein DsbE	Q5ZX70	1	6	2
Small protein A, tmRNA-binding	Q5ZYK0	1	6	2
Acyl carrier protein	Q5ZYL3	1	6	2
Uncharacterized protein	Q5ZZE6	1	6	2
Malate oxidoreductase	Q5ZXT0	1	6	1
2-methylisocitrate lyase	Q5ZZF8	1	6	1
Fumarylacetoacetate hydrolase	Q5ZT83	1	5
Arginine N-succinyltransferase	Q5ZUT6	1	5	13
Uncharacterized protein	Q5ZZC1	1	5	12
3-oxoacyl-(Acyl carrier protein) reductase	Q5ZVP5	1	5	10
Ubiquinone biosynthesis O-methyltransferase	Q5ZUU3	1	5	9
Uncharacterized protein	Q5ZYJ7	1	5	9
Cell division protein FtsX	Q5ZS51	1	5	6
UDP-2,3-diacylglucosamine hydrolase	Q5ZV88	1	5	5
Glutamine-dependent NAD(+) synthetase	Q5ZXJ7	1	5	5
Ubiquinone/menaquinone biosynthesis C-methyltransferase UbiE	Q5ZRH9	1	5	4
Toluene tolerance protein Ttg2C	Q5ZX89	1	5	4
Phosphopantetheine-protein transferase	Q5ZXE7	1	5	4
Multidrug resistance efflux pump PmrA	Q5ZYE2	1	5	4
Lipid A biosynthesis acyltransferase	Q5ZYK9	1	5	4
Purine nucleoside phosphorylase II	Q5ZVM4	1	5	3
Type IV pilus biogenesis protein PilN	Q5ZX05	1	5	3
Bifunctional protein FolD	Q5ZVZ1	1	5	2
L-threonine 3-dehydrogenase	Q5ZXM9	1	5	2
IcmH (DotU)	Q5ZYB3	1	5	2
Oxygen-dependent coproporphyrinogen-III oxidase	Q5ZW72	1	5	1
Methylase	Q5ZZF0	1	5	1
Copper efflux ATPase	Q5ZV16	1	4	25
DUF155 domain-containing protein	Q5ZZA4	1	4	16
DedA/PAP2 domain protein	Q5ZVC8	1	4	8
Acyl CoA dehydrogenase, short chain specific	Q5ZXC9	1	4	8
ABC transporter ATP-binding protein	Q5ZXP9	1	4	6
Phosphatidylserine decarboxylase proenzyme	Q5ZRA9	1	4	5
Uncharacterized protein	Q5ZRQ2	1	4	5
NADH dehydrogenase I, E subunit	Q5ZRU2	1	4	4
ATP-dependent dethiobiotin synthetase BioD	Q5ZVG5	1	4	4
Metal-activated pyridoxal enzyme	Q5ZSJ5	1	4	3
AAA_28 domain-containing protein	Q5ZS56	1	4	2
Tpr	Q5ZUU0	1	4	2
MTS domain-containing protein	Q5ZV36	1	4	2
Pteridine reductase 1	Q5ZRL8	1	4	1
Uncharacterized protein	Q5ZSY0	1	4	1
Imidazole glycerol-phosphate synthase	Q5ZW92	1	4	1
N5-carboxyaminoimidazole ribonucleotide synthase	Q5ZYZ4	1	4	1
Hydantoin racemase	Q5ZU24	1	3
Protein DlpA	Q48806	1	3	8
Oxidase	Q5ZV08	1	3	7
Carbamoyltransferase HypF	Q5ZSP3	1	3	5
Type II secretory pathway protein E	Q5ZVW9	1	3	4
50S ribosomal protein L3 glutamine methyltransferase	Q5ZT61	1	3	3
(AraC family) transcriptional regulator	Q5ZTJ8	1	3	3
Uncharacterized protein	Q5ZUE7	1	3	3
Rho-GAP domain-containing protein	Q5ZUK0	1	3	2
2-amino-4-hydroxy-6-hydroxymethyldihydropteridine pyrophosphokinase FolK	Q5ZVA1	1	3	2
Hydroxyacylglutathione hydrolase	Q5ZVZ3	1	3	2
Uncharacterized protein	Q5ZWH4	1	3	2
Phage related integrase	Q5ZWK0	1	3	2
Uncharacterized protein	Q5ZZ79	1	3	2
Transposase Tn5	Q5ZTU2	1	3	1
RNA-splicing ligase RtcB	Q5ZTG1	1	2	13
Sulfate transporter	Q5ZXN4	1	2	13
Uncharacterized protein	Q5ZYY4	1	2	9
DUF2063 domain-containing protein	Q5ZXR5	1	2	5
Glutaredoxin domain-containing protein	Q5ZZF2	1	2	5
tRNA pseudouridine synthase B	Q5ZRV6	1	2	4
IAA acetyltransferase/MarR transcriptional regulatory protein	Q5ZW75	1	2	4
Hypothetical exported protein	Q5ZXR2	1	2	4
DUF5617 domain-containing protein	Q5ZXT9	1	2	4
Nicotinate phosphoribosyltransferase	Q5ZYU1	1	2	4
Transcriptional regulator	Q5ZT19	1	2	3
Hydrolase	Q5ZUR6	1	2	3
Oxidoreductase, short chain dehydrogenase/reductase	Q5ZVE0	1	2	2
Uncharacterized protein	Q5ZXF7	1	2	2
ABC transporter, ATP binding protein	Q5ZX83	1	2	1
4-amino-4-deoxychorismate lyase	Q5ZXY5	1	2	1
Multifunctional: 2-keto-3-deoxygluconate 6-phosphate aldolase/(4-hydroxy-2-oxoglutarate aldolase)	Q5ZYF2	1	2	1
Short chain dehydrogenase	Q5ZVL3	1	1	17
Type II secretion system protein L	Q5ZUD0	1	1	11
Cyclopropane fatty acid synthase	Q5ZWF4	1	1	11
Flagellar assembly protein FliH	Q5ZUN5	1	1	5
Glutamine amidotransferase	Q5ZSB3	1	1	4
Sensory box/GGDEF family	Q5ZWM8	1	1	3
Uncharacterized protein	Q5ZXD5	1	1	2
Cell division protein FtsK	Q5ZUM7		43	24
Alkaline phosphatase	Q5ZUE6		35	2
Alcohol dehydrogenase, iron containing	Q5ZTB2		24	8
2-dehydro-3-deoxyphosphooctonate aldolase	Q5ZWA3		20	12
NAGPA domain-containing protein	Q5ZUM1		20	4
Protein translocase subunit SecY	Q5ZYM3		19	7
LPS-assembly protein LptD	Q5ZYR4		19	2
4-hydroxy-tetrahydrodipicolinate synthase	Q5ZT51		19	1
Octaprenyl diphosphate synthase IspB	Q5ZS63		16	14
Transcription-repair-coupling factor	Q5ZWY0		16	5
Zn-dependent protease	Q5ZWA9		16	4
Homogentisate 1,2-dioxygenase	Q9S4T0		16	4
DNA mismatch repair protein MutL	Q5ZS22		15	8
Probable cytosol aminopeptidase	Q5ZS88		15	6
OMP_b-brl domain-containing protein	Q5ZXJ9		15	4
Ribonuclease HII	Q5ZVR7		15	3
Uncharacterized protein	Q5ZRJ7		14	6
Flagellar L-ring protein	Q5ZW65		13	4
Metallo-beta-lactamase family protein	Q5ZXF1		13	4
Hypothetical BNR/Asp box repeat protein	Q5ZRE3		13	1
3-hydroxyisobutyryl Coenzyme A hydrolase	Q5ZX62		13	1
Potassium efflux system KefA	Q5ZV79		12	20
Glutathione-regulated potassium efflux system	Q5ZUB0		12	10
Putative phage protein	Q5ZZ61		12	10
PNPLA domain-containing protein	Q5ZVL4		12	9
Glutamyl-tRNA(Gln) amidotransferase subunit A	Q5ZUQ7		12	3
Coiled-coil-containing protein	Q5ZU55		12	2
Peptidase, M23/M37 family	Q5ZXA7		12	1
Uncharacterized protein lpg1689	P37033		11	5
Membrane fusion protein	Q5ZX81		11	4
FAD linked oxidase	Q5ZVK8		11	2
Uncharacterized protein	Q5ZT81		11	1
APH domain-containing protein	Q5ZXG4		10	6
Uncharacterized protein	Q5ZZ99		10	6
VWFA domain-containing protein	Q5ZRM4		10	5
tRNA-(Ms(2)io(6)a)-hydrolase(TRNA hydroxylase)	Q5ZV90		10	4
Adenylate kinase	Q5ZVM9		10	2
Uncharacterized protein	Q5ZV55		10	1
Uncharacterized protein	Q5ZRA8		9	20
Cysteine desulfurase	Q5ZXX6		9	6
Porphobilinogen deaminase	Q5ZRY6		9	5
Hemin binding protein Hbp	Q5ZZI6		9	3
Penicillin binding protein 1C, peptidoglycan biosynthesis	Q5ZUX8		9	2
Lipid-A-disaccharide synthase 2	Q5ZRD7		8	6
Hydrolase, isochorismatase family	Q5ZX29		8	4
Poly-beta-hydroxybutyrate polymerase	Q5ZXY1		8	4
Flagella basal body P-ring formation protein FlgA	Q5ZX25		8	2
L-sorbosone dehydrogenase	Q5ZRV9		8	1
Conserved domain protein	Q5ZSB7		8	1
Tryptophanyl tRNA synthetase	Q5ZVJ6		8	1
Bifunctional purine biosynthesis protein PurH	Q5ZYB2		7	10
Purine nucleoside phosphorylase	Q5ZVK6		7	5
WaaM	Q5ZRE1		7	4
Peptide aspartate b-dioxygenase	Q5ZSQ4		7	4
Rhodanese domain protein	Q5ZUE8		7	3
Metal dependent phosphoesterase	Q5ZVJ8		7	3
Uncharacterized protein	Q5ZX52		7	2
Stearoyl-CoA-9-desaturase	Q5ZY17		6	15
Sensor histidine kinase CpxA	Q5ZVK3		6	10
Bifunctional glutamine synthetase adenylyltransferase/adenylyl-removing enzyme	Q5ZXQ2		6	10
1-acyl-sn-glycerol-3-phosphate acetyltransferase	Q5ZY23		6	7
L-asparaginase I (Cytoplasmic)	Q5ZRK8		6	2
Carboxylesterase/phospholipase	Q5ZYK3		6	1
Myo-inositol catabolism protein IolE	Q5ZUZ3		5	24
Rhodanese domain protein	Q5ZT59		5	10
3-deoxy-D-manno-octulosonic acid transferase	Q5ZT25		5	7
Sporulation protein	Q5ZRR8		5	5
Glycosyltransferase	Q5ZV10		5	5
Cytochrome c oxidase subunit 1	Q5ZRI5		5	4
Uncharacterized protein	Q5ZSJ8		5	4
Thiol:disulfide interchange protein DsbD	Q5ZUW2		5	4
Thymidylate synthase	Q5ZRL3		5	3
Hypothetical membrane protein	Q5ZVI2		5	3
Pseudouridine synthase	Q5ZVV7		5	3
Alpha-amylase, putative	Q5ZUX1		5	2
Histidine biosynthesis bifunctional protein HisB	Q5ZW89		5	2
Dihydropteroate synthase	Q5ZRT3		5	1
Isopentenyl-diphosphate delta-isomerase	Q5ZTV7		5	1
Uncharacterized protein	Q5ZV77		5	1
Site specific recombinase, phage integrase	Q5ZUD7		4	7
Phosphoenolpyruvate carboxylase	Q5ZV35		4	6
Rtn protein	Q5ZVH1		4	6
5'-nucleotidase SurE	Q9S4T3		4	6
3',5'-cyclic nucleotide phosphodiesterase	Q5ZU56		4	5
Mercuric reductase	Q5ZV78		4	5
Alanine racemase	Q5ZXJ2		4	5
Uncharacterized protein	Q5ZRP8		4	4
Sensor histidine kinase/response regulator LuxN	Q5ZSL1		4	4
Uncharacterized protein	Q5ZTJ0		4	4
Uncharacterized protein	Q5ZUT3		4	4
DNA polymerase III, delta prime subunit	Q5ZVP0		4	4
Uncharacterized protein	Q5ZXQ4		4	3
Uncharacterized protein	Q5ZRD2		4	2
DNA processing enzyme DprA (SMF family)	Q5ZSC2		4	2
Uncharacterized protein	Q5ZSR2		4	2
Uncharacterized protein	Q5ZRD6		4	1
6-pyruvoyl tetrahydropterin synthase, putative	Q5ZRL6		4	1
Exodeoxyribonuclease 7 small subunit	Q5ZT36		4	1
Putative pterin-4-alpha-carbinolamine dehydratase	Q5ZU09		4	1
Type 4 fimbrial biogenesis protein PilZ	Q5ZVN9		4	1
2-dehydro-3-deoxy-phosphogluconate aldolase	Q5ZWZ4		4	1
Type III pantothenate kinase	Q5ZX22		4	1
tRNA (guanine-N(7)-)-methyltransferase	Q5ZY91		4	1
UDP-3-O-acylglucosamine N-acyltransferase 1	Q5ZZB1		4	1
Sensor kinase HydH	Q5ZUN0		3	14
Transcriptional regulator OruR, AraC family	Q5ZTY8		3	7
Uncharacterized protein	Q5ZVF8		3	6
Uncharacterized protein	Q5ZSL0		3	4
Uncharacterized protein	Q5ZTG3		3	4
1-(5-phosphoribosyl)-5-[(5-phosphoribosylamino)methylideneamino] imidazole-4-carboxamide isomerase	Q5ZW91		3	4
Amidase (Enantiomer selective)	Q5ZT10		3	3
Cardiac ankyrin repeat protein	Q5ZT43		3	3
Glycerol-3-phosphate dehydrogenase [NAD(P)+]	Q5ZT56		3	3
Spectinomycin phosphotransferase	Q5ZVE8		3	3
DNA mismatch repair protein MutH	Q5ZVG0		3	3
AAA_28 domain-containing protein	Q5ZW74		3	3
1-acyl-sn-glycerol-3-phosphate acyltransferase	Q5ZX44		3	3
Ubiquinol-cytochrome c reductase iron-sulfur subunit	Q5ZS14		3	2
Uncharacterized protein	Q5ZU42		3	2
Oxidoreductase (L-gululonolactone oxidase)	Q5ZUK4		3	2
Calcium-transporting ATPase	Q5ZWF9		3	2
Sepiapterin reductase	Q5ZXM1		3	2
NADPH-dependent 7-cyano-7-deazaguanine reductase	Q5ZXW5		3	2
DNA replication and repair protein RecF	Q5ZZK6		3	2
Co-chaperone protein DjlA	Q9X772		3	2
3-octaprenyl-4-hydroxybenzoate carboxy-lyase	Q5ZRE9		3	1
tRNA (cytidine/uridine-2'-O-)-methyltransferase TrmJ	Q5ZUP6		3	1
Esterase	Q5ZV65		3	1
Ankyrin repeat-containing protein	Q5ZYD6		3	1
Coiled-coil-containing protein	Q5ZV52		2	11
ATP dependent RNA helicase DbpA	Q5ZTN9		2	7
IcmP (DotM)	Q5ZYC7		2	6
Uncharacterized protein	Q5ZYJ1		2	3
Flavin prenyltransferase UbiX	Q5ZRJ8		2	2
UDP-N-acetylmuramyl tripeptide synthase	Q5ZS39		2	2
Peptidoglycan-associated protein	Q5ZTW5		2	2
Segregation and condensation protein B	Q5ZVJ4		2	2
Uncharacterized protein	Q5ZWW1		2	2
Nitrilase	Q5ZWY4		2	2
DNA primase	Q5ZT05		2	1
Sulfate transporter	Q5ZTG9		2	1
Uracil DNA glycosylase	Q5ZUU2		2	1
O-antigen initiating glycosyl transferase group 4-UDP-N-acetylmuramyl pentapeptide phosphotransferase/(N-acetylgalactosaminyl transferase TrsF)	Q5ZXG9		2	1
Amino acid antiporter	Q5ZYG8		2	1
LupA domain-containing protein	Q5ZWD7		1	12
rRNA methyltransferase (SUN protein)	Q5ZSC6		1	6
Uncharacterized protein	Q5ZRJ3		1	5
NADH-quinone oxidoreductase subunit J	Q5ZRU7		1	5
Carrier/transport protein	Q5ZWY5		1	4
Transcription regulator protein, DeoR family	Q5ZTJ4		1	2
DNA_pol_B_exo2 domain-containing protein	Q5ZVN1		1	2
3-demethoxyubiquinol 3-hydroxylase	Q5ZZI2		1	2
b. The protein content of these sample preparations was analyzed by the use one-dimensional Protein Identification Technology. The data were searched against L. pneumophila (2930 entries in UniProt) protein database. Results were filtered to retain proteins with ≤1% False Discovery Rate (FDR) confidence. The table shows numbers of peptides matched to individual L. pneumophila proteins and lists a…
a. UniProtKB Accession Number
